**Index of Issues:** July, pp. 1–136; August, pp. 137–244; September, pp. 245–354; October, pp. 355–456; November, pp. 457–568; December, pp. 569–748. The September Supplement, pp. A1–A648, is not included in this index. The index for that issue had been provided in the back of the Supplement itself.

## SUBJECT INDEX TO VOLUME 65

Subject entries for all materials in the JOURNAL appear in this index. Entries from the JOURNAL departments are identified as follows: Book Reviews—(BR); Clinical Reports—(CR); Correspondence—(CO); Editorial Views—(EV); Laboratory Reports—(LR); Original Article—(OA); Medical Intelligence—(MI); Special Article—(SA); Reports of Scientific Meetings—(SM).

### A

**Abdominal aorta, *See under* Arteries**

**Abdominal surgery, *See under* Surgery**

**Abortion, *See under* Pregnancy**

**Absorber, *See under* Equipment**

**Acid-base equilibrium**

#### pH

and risk of acid aspiration in morbidly obese patients, prophylactic intravenous cimetidine reduces (CR) [Lam, Grace, Penny & Vezina], 684

**Adenosine, *See under* Receptors**

**Adrenal medulla, *See under* Sympathetic nervous system**

**Adults, *See under* Age factors**

**Aerosols**

delivery devices for anesthesia circuit (CO) [Bush], 240

**Age factors**

#### adults

effect of, on solubility of volatile anesthetics in human tissues (LR) [Lerman, Schmitt-Bantel, Gregory, Willis & Eger], 307

#### elderly

effect of, on solubility of volatile anesthetics in human tissues (LR) [Lerman, Schmitt-Bantel, Gregory, Willis & Eger], 307  
and effects of phenobarbital on cerebral blood flow and metabolism in rats (OA) [Baughman, Hoffman, Miletich & Albrecht], 500

#### neonate

effect of, on solubility of volatile anesthetics in human tissues (LR) [Lerman, Schmitt-Bantel, Gregory, Willis & Eger], 307

**Air embolism, *See under* Embolism**

**Airway**

#### anesthesia

topical, technique for (CO) [Bourke], 230  
topical, technique for (CO) [Rooney], 230

#### aspiration

##### peanut

in pediatric patients, bronchoscopic administration of nebulized racemic epinephrine to facilitate removal of (CR) [Bready, Orr, Petty, Grover & Harman], 523

#### high pressure

due to malfunctioning anesthesia ventilator (CR) [Roth, Tweedie & Sommer], 532

Nd-YAG laser application in, flammability of endotracheal tubes during (LR) [Geffin, Shapshay, Bellack, Hobin & Setzer], 511

#### obstruction

acute upper, pulmonary edema following (CO) [Frank & Schreiber], 106  
cutaneous monitoring of carbon dioxide tension during bronchoscopy in infant with (CO) [Weinberg & Werbin], 703

**Airway burns, *See under* Complications**

**Airway pressure, *See under* Measurement**

**Airway resistance, *See under* Complications**

**Alcohol**

#### abuse

departmental policy addressing (SA) [Lecky, Aukburg, Conahan, Geer, Ominsky, Gross, Muravchick & Wollman], 414

#### addiction

and effects of chronic alcohol intake on anesthetic responses to diazepam and thiopental in rats (OA) [Newman, Curran & Becker], 196

#### cross-tolerance

and effects of chronic alcohol intake on anesthetic responses to diazepam and thiopental in rats (OA) [Newman, Curran & Becker], 196

#### tolerance

and effects of chronic alcohol intake on anesthetic responses to diazepam and thiopental in rats (OA) [Newman, Curran & Becker], 196

**Alfentanil, *See under* Anesthetics, intravenous; Pharmacodynamics; Pharmacokinetics; Potency, anesthetic**

**American Society of Anesthesiologists, *See under* Organizations**

**Amikacin, *See under* Antibiotics**

**Aminophylline, *See under* Pharmacology**

**Analgesics**

#### abuse

departmental policy addressing (SA) [Lecky, Aukburg, Conahan, Geer, Ominsky, Gross, Muravchick & Wollman], 414

#### codeine

and effect of droperidol pretreatment on postanesthetic vomiting in children undergoing strabismus surgery (CR) [Lerman, Eustis & Smith], 322

#### fentanyl

failure of, to prevent postoperative paralytic ileus (OA) [Wallin, Cassuto, Högström, Rimbäck, Faxén & Tollesson], 292

#### narcotic

##### hydromorphone

nalbuphine augmentation of analgesia and reversal of side effects following (CR) [Henderson & Cohen], 216

##### morphine

in children (OA) [Attia, Ecoffey, Sandouk, Gross & Samii], 590  
intrathecally injected, in unanesthetized dogs, cardiorespiratory effects and kinetics of (OA) [Atchison, Durant & Yaksh], 609

##### nalbuphine

augmentation of analgesia, and reversal of side effects following epidural hydromorphone (CR) [Henderson & Cohen], 216

##### sufentanil

epidural and intravenous, studies in rat (OA) [Colpaert, Leysen, Michiels & van den Hoogen], 41

#### pentazocine

failure of, to prevent postoperative paralytic ileus (OA) [Wallin, Cassuto, Högström, Rimbäck, Faxén & Tollesson], 292

- peptides**  
**D-Ala<sup>2</sup>-D-Leu<sup>5</sup>-enkephalin**  
 intrathecally injected, in unanesthetized dogs, cardiorespiratory effects and kinetics of (OA) [Atchison, Durant & Yaksh], 609
- receptors**  
 and lack of alteration of heat response of unmyelinated primary afferents in monkey by narcotics (OA) [Raja, Meyer, Campbell & Khan], 468
- tolerance**  
 effects of chronic alcohol intake on, in rats (OA) [Newman, Curran & Becker], 196
- Anatomy**  
**tissues**  
 human, effect of age on solubility of volatile anesthetics in (LR) [Lerman, Schmitt-Bantel, Gregory, Willis & Eger], 307
- Anesthesia**  
**burns**  
 are resistant to atracurium (CR) [Dwersteg, Pavlin & Heimbach], 517  
 clinical pharmacology and drug therapy in (MI) [Martyn], 67
- cardiac**  
 barbiturate protection during, recommendations regarding (CO) [Scheller, Drummond, Todd, Shapiro & Zornow], 230  
 for bypass, cerebral protection by barbiturate (CO) [Michenfelder], 232  
 for bypass, cerebral protection by barbiturate (CO) [Shanks, Harter & Brunner], 232  
 for bypass, cerebral protection by barbiturate (CO) [Slogoff, Nussmeier & Arlund], 233  
 in cyanotic heart disease, comparative effects of halothane and ketamine on systemic arterial oxygen saturation and (CR) [Greeley, Bushman, Davis & Reves], 666  
 effect of induction regimens on oxygen saturation in cyanotic congenital heart disease (CR) [Laishley, Burrows, Lerman & Roy], 673  
 increased perioperative risk in, in Down's syndrome (CR) [Murray, Gillivray & Duker], 221  
 intraoperative esophageal electrocardiography for dysrhythmia analysis and therapy in surgical patients (CR) [Greeley, Kates, Armstrong & Grant], 669
- cardiovascular**  
 and cerebral resuscitation with barbiturates (CO) [Michenfelder], 235  
 and cerebral resuscitation with barbiturates (CO) [Safar, Bleyaert, Detre, Moossy & Reinmuth], 234  
 and perioperative myocardial ischemia (CR) [Slogoff & Keats], 539
- computer-assisted**  
 for intravenous drugs (CO) [Alvis, Jacobs & Reves], 345  
 for intravenous drugs (CO) [Maitre, Vozech & Stanski], 344
- general**  
 facial paralysis after (CR) [Glauber], 516
- history of, See under History**
- military**  
 on western front: the Anglo-American experience of World War I (SA) [Courington & Calverley], 642
- morbidity**  
 and risk of abortion following general anesthesia for surgery during pregnancy (CO) [Cohen], 706  
 and risk of abortion following general anesthesia for surgery during pregnancy (CO) [Duncan], 706
- obstetric**  
 a national survey (SA) [Gibbs, Krischer, Peckham, Sharp & Kirschbaum], 298
- bupivacaine in, cardiotoxicity associated with (CO) [Marx], 116  
 for cesarean delivery with epidural bupivacaine and fentanyl (CR) [Gaffud, Bansal, Lawton, Velasquez & Watson], 331
- cesarean section**  
 administration—a continuing problem (EV) [Levinson & Shnider], 245  
 in idiopathic hypertrophic subaortic stenosis (CR) [Boccio, Chung & Harrison], 663  
 massive air embolism during (CR) [Younker, Rodriguez & Kavanagh], 77  
 phantom limb pain and epidural anesthesia for (CR) [Carrie & Glynn], 220  
 coverage—a continuing problem (EV) [Levinson & Shnider], 245
- eclampsia**  
 local anesthetics with epinephrine for epidural anesthesia in (CR) [Heller & Goodman], 224  
 and effect of intravenous epinephrine on uterine artery blood flow velocity in pregnant guinea pig (OA) [Chestnut, Weiner, Martin, Herrig & Wang], 633  
 is midazolam desirable for sedation in parturients? (CO) [Cammann, Cohen & Ostheimer], 441  
 nifedipine or verapamil counteracts hypertension in gravid ewes (OA) [Norris, Rose & Dewan], 254  
 peripartum patients, succinylcholine in (CO) [Ramzan], 441  
 and risk of abortion following general anesthesia for surgery during pregnancy (CO) [Cohen], 706  
 and risk of abortion following general anesthesia for surgery during pregnancy (CO) [Duncan], 706  
 and uptake and distribution of bupivacaine in fetal lambs (OA) [Kennedy, Miller, Bell, Doshi, deSousa, Kennedy, Heald & David], 247
- ophthalmologic**  
 effect of droperidol pretreatment on postanesthetic vomiting in children during (CR) [Lerman, Eustis & Smith], 322  
 for open eye surgery (CO) [Bourke], 110  
 for open eye surgery (CO) [Weiner, Olk & Meyers], 109  
 in penetrating ocular injuries (CO) [Rich, Witherspoon, Morris & Feist], 108
- pediatric**  
 bradycardia delays onset of action of intravenous atropine in (CR) [Zimmerman & Steward], 320  
 bronchoscopy in infant with airway obstruction, cutaneous monitoring of carbon dioxide tension during (CO) [Weinberg & Werbin], 703  
 in children 11 days to 4 years of age, changes in lung volume and lung-thorax compliance during cardiac surgery (OA) [Jonmarker, Larsson & Werner], 259  
 comparison of nitroglycerin and nitroprusside for inducing hypotension in (OA) [Yaster, Simmons, Tolo, Pepple, Wetzel & Rogers], 175  
 in cyanotic heart disease, comparative effects of halothane and ketamine on systemic arterial oxygen saturation and (CR) [Greeley, Bushman, Davis & Reves], 666  
 and developmental outcome in children undergoing surgery with profound hypothermia (CR) [Blackwood, Haka-Ikse & Steward], 437  
 in Dutch-Kentucky syndrome (CR) [Browder, Lew & Shahbazian], 218  
 effect of droperidol pretreatment on postanesthetic vomiting in children during (CR) [Lerman, Eustis & Smith], 322  
 effect of induction regimens on oxygen saturation in cyanotic congenital heart disease (CR) [Laishley, Burrows, Lerman & Roy], 673

- epidural morphine in, pharmacokinetics and CO<sub>2</sub> sensitivity (OA) [Attia, Ecoffey, Sandouk, Gross & Samii], 590
- in infants with normal and elevated pulmonary vascular resistance, pulmonary and systemic hemodynamic effects of nitrous oxide for (OA) [Hickey, Hansen, Strafford, Thompson, Jonas & Mayer], 374
- intraoperative esophageal electrocardiography for dysrhythmia analysis and therapy in surgical patients (CR) [Greeley, Kates, Armstrong & Grant], 669
- and neuromuscular blockade in patient with stiff-baby syndrome (CR) [Cook & Kaplan], 525
- and new method for maintaining body temperature in children (CO) [Nightingale & Meakin], 447
- outpatient, and perioperative blood glucose concentrations (CR) [Welborn, McGill, Hannallah, Nisselson, Ruttimann & Hicks], 543
- pharmacokinetics of rectal midazolam for premedication for (CR) [Saint-Maurice, Meistelman, Rey, Esteve, deLauture & Olive], 536
- postanesthetic apnea and periodic breathing in infants (CR) [Welborn, Ramirez, Oh, Ruttimann, Fink, Guzzetta & Epstein], 658
- and postoperative pain relief after hypospadias repair (CR) [Blaise & Roy], 84
- spinal anesthesia in (CO) [Dohi & Seino], 559
- spinal anesthesia in (CO) [Harnik], 560
- tracheo-bronchial angles in infants and children (CO) [Bloch], 236
- for urologic and upper abdominal surgery (CR) [Ecoffey, Dubousset & Samii], 87
- pregnancy**
- risk of abortion following, for surgery during (CO) [Cohen], 706
- risk of abortion following, for surgery during (CO) [Duncan], 706
- teratology**
- and risk of abortion following general anesthesia for surgery during pregnancy (CO) [Cohen], 706
- and risk of abortion following general anesthesia for surgery during pregnancy (CO) [Duncan], 706
- thoracic**
- one-lung, with recent pulmonary embolism of ventilated lung (CR) [Vaghadia & Doll], 98
- in traumatic pseudoaneurysm of pulmonary artery (CR) [DiNardo], 334
- urologic**
- for lithotripsy, support of arms during (CO) [Jones, Zornow & Sarnat], 341
- World War I**
- on western front: the Anglo-American experience of World War I (SA) [Courington & Calverley], 642
- Anesthesia machines, See under Equipment**
- Anesthesia records, See under Records**
- Anesthesia residents, See under Education; Manpower**
- Anesthesiologists**
- and obstetric anesthesia coverage (EV) [Levinson & Shnider], 245
- occupational hazards**
- and departmental policy addressing chemical substance abuse (SA) [Lecky, Aukburg, Conahan, Geer, Ominsky, Gross, Muravchick & Wollman], 414
- Anesthetic equipment, See under Equipment**
- Anesthetic techniques**
- bronchoscopy**
- dilution of anesthetic gases by new light source for (CO) [Berci & MacDonald], 446
- dilution of anesthetic gases by new light source for (CO) [Mostello & Patel], 445
- fiberoptic**
- and double-lumen tube position (CO) [Benumof], 117
- placement of double-lumen tubes in (CO) [Matthew & Hirschmann], 118
- in infant with airway obstruction, cutaneous monitoring of carbon dioxide tension during (CO) [Weinberg & Werbin], 703
- suction port on pediatric flexible bronchoscope, another use for (CO) [Rosen, Rosen & Nahrwold], 116
- topicalization, oxygenation, and suction *via* single-channel fiberoptic bronchoscope (CO) [Norley & Lander], 116
- closed circuit**
- made easier (CO) [Frenette, Baillargeon & Perreault], 704
- continuous flow apneic ventilation**
- during thoracotomy (OA) [Babinski, Smith & Bunegin], 399
- endobronchial insufflation**
- during thoracotomy (OA) [Babinski, Smith & Bunegin], 399
- endobronchial intubation**
- accidental, early warning sign of: sudden drop or sudden rise in? (CO) [Gandhi, Munshi & Kampine], 114
- accidental, early warning sign of: sudden drop or sudden rise in? (CO) [Riley, Finucane & Marcy], 115
- endotracheal intubation**
- addition use for esophageal stethoscope during (CO) [Shah & Nossaman], 453
- epidural**
- bupivacaine and fentanyl in, surgical analgesia for cesarean delivery with (CR) [Gaffud, Bansal, Lawton, Velasquez & Watson], 331
- bupivacaine in, in fetal lambs (OA) [Kennedy, Miller, Bell, Doshi, deSousa, Kennedy, Heald & David], 247
- failure of, to prevent postoperative paralytic ileus (OA) [Wallin, Cassuto, Högström, Rimbäck, Faxén & Tolleson], 292
- local anesthetics with epinephrine for, in preeclampsia (CR) [Heller & Goodman], 224
- morphine**
- in children (OA) [Attia, Ecoffey, Sandouk, Gross & Samii], 590
- narcotic**
- reversal of side effects of (CR) [Henderson & Cohen], 216
- neurologic changes following epidural injection of potassium chloride and diazepam in (CR) [Lin, Becker & Shapiro], 210
- obstetric**
- test dose, maternal heart rate changes with (CR) [Cartwright, McCarroll & Antzaka], 226
- opiates**
- receptor binding, in epidural and intravenous sufentanil in rat (OA) [Colpaert, Laysen, Michiels & van den Hoogen], 41
- rare misplacements of epidural catheters (CR) [Koch & Nielsen], 556
- renal sympathetic blockade, effects of, on renal hemodynamics in patients undergoing major aortic abdominal surgery (CR) [Gamulin, Forster, Simonet, Aymon & Favre], 688
- and simultaneous recording of maternal and fetal heart rate (CO) [Abouleish & Johnson], 558
- and simultaneous recording of maternal and fetal heart rate (CO) [Chestnut and Weiner], 558
- and supraventricular tachycardia associated with extracorporeal shock wave lithotripsy (CR) [Walts & Atlee], 521
- for urologic and upper abdominal surgery in infants and children (CR) [Ecoffey, Dubousset & Samii], 87
- use of extension line in (CO) [Gurmarnik], 236
- fiberoptic bronchoscopy**
- as approach to problem airway (CO) [Lu, Frost & Goldiner], 101

- hypotension**  
**induced**  
**isoflurane**  
 and hypocapnia, in dogs, cerebral metabolism and EEG during combination of (OA) [Artru], 602  
**verapamil**  
 -pancuronium neuromuscular blockade in cats, edrophonium antagonizes (OA) [Carpenter & Mulroy], 506  
 with sodium nitroprusside and isoflurane, comparison of direct blood pressure measurements at radial and dorsalis pedis arteries (CR) [Abou-Madi, Lenis, Archer, Ravussin & Trop], 692  
**nitroglycerin**  
 and nitroprusside, compared for inducing hypotension in children (OA) [Yaster, Simmons, Tolo, Pepple, Wetzel & Rogers], 175  
**nitroprusside**  
 and nitroglycerin, compared for inducing hypotension in children (OA) [Yaster, Simmons, Tolo, Pepple, Wetzel & Rogers], 175  
**intercostal nerve**  
 total spinal anesthesia following (CR) [Gauntlett], 82  
**intrathecal injection**  
 of D-Ala<sup>2</sup>-D-Leu<sup>5</sup>-enkephalin and morphine, cardiorespiratory effects and kinetics of (OA) [Atchison, Durant & Yaksh], 609  
**intravenous**  
**regional**  
 evolution and prevention of leakage under tourniquet (CR) [Grice, Morell, Balestrieri, Stump & Howard], 316  
**intravenous infusion**  
 of alfentanil, and dose-response curves and pharmacokinetics of (EV) [Waud & Waud], 355  
 of alfentanil, required to supplement nitrous oxide anesthesia for general surgery (OA) [Ausems, Hug, Stanski & Burm], 362  
**laryngoscopy**  
 laryngoscope handle malfunction during (CO) [Rocco, Chatwani & Shupak], 107  
**lumbar**  
 for cesarean section, phantom limb pain and [Carrie & Glynn], 220  
 neurologic changes following epidural injection of potassium chloride and diazepam in (CR) [Lin, Becker & Shapiro], 210  
**magnetic resonance imaging**  
 anesthetic management of acutely ill patients during (CO) [Smith, Askey, Young & Kressel], 567  
**neuroleptoanesthesia**  
 dopaminergic receptor in adrenal medulla as possible site of action for (OA) [Montiel, Artalejo, Bermejo & Sánchez-García], 474  
**peridural**  
 for cesarean section, phantom limb pain and [Carrie & Glynn], 220  
 problems with Arrow-Racz epidural catheter in (CO) [Ellis & Ramamurthy], 124  
 problems with Arrow-Racz epidural catheter in (CO) [Frankhouser], 125  
**peridural caudal**  
 and postoperative pain relief after hypospadias repair (CR) [Blaise & Roy], 84  
**rapid sequence, priming principle**  
 with vecuronium, efficacy of (CO) [Rupp, Taboada & Miller], 121  
 with vecuronium, efficacy of (CO) [Sosis], 120
- regional**  
 bupivacaine and fentanyl in, surgical analgesia for cesarean delivery with (CR) [Gaffud, Bansal, Lawton, Velasquez & Watson], 331  
 bupivacaine in, in fetal lambs (OA) [Kennedy, Miller, Bell, Doshi, deSousa, Kennedy, Heald & David], 247  
**continuous axillary block**  
 sheath distention, as aid to catheter placement (CO) [Moore & Cockings], 131  
**penile**  
 and postoperative pain relief after hypospadias repair (CR) [Blaise & Roy], 84  
 total spinal anesthesia following (CR) [Gauntlett], 82  
**spinal**  
 changes in skin temperature, relationship to sympathetic blockade during (EV) [Greene], 137  
 changes in skin temperature, relationship to sympathetic blockade during (OA) [Chamberlain & Chamberlain], 139  
 postlumbar puncture headache in pediatric oncology patients (CR) [Bolder], 696  
 in premature infants (CO) [Dohi & Seino], 559  
 in premature infants (CO) [Harnik], 560  
**sympathetic block**  
 changes in skin temperature and relationship to, during spinal anesthesia (EV) [Greene], 137  
 changes in skin temperature and relationship to, during spinal anesthesia (OA) [Chamberlain & Chamberlain], 139
- Anesthetics**  
**gases**  
 long mass-spectrometer sampling catheters for assessing concentration of, frequency response of (LR) [Scamman & Fishbaugh], 422  
**nitrous oxide**  
 effects of, on postoperative bowel motility (CR) [Giuffre & Gross], 699  
 effects on somatosensory evoked potentials in humans (OA) [Peterson, Drummond & Todd], 35  
 exhaled, new technique of scavenging (CR) [Nitka, O'Riordan & Julien], 314  
 lack of reversal of analgesia with, by low-dose naloxone (CO) [Gillman], 449  
 pulmonary and systemic hemodynamic effects of, in infants with normal and elevated pulmonary vascular resistance (OA) [Hickey, Hansen, Strafford, Thompson, Jonas & Mayer], 374  
 withdrawal reduces intracranial pressure in presence of pneumocephalus (OA) [Skahen, Shapiro, Drummond, Todd & Zeiman], 192  
**intraspinal**  
**morphine**  
 hyperalgesic response in patient receiving high concentrations of (CO) [Ali], 449  
**intravenous**  
**alfentanil**  
 dose-response curves and pharmacokinetics of (EV) [Waud & Waud], 355  
 plasma concentrations of, required to supplement nitrous oxide anesthesia for general surgery (OA) [Ausems, Hug, Stanski & Burm], 362  
**bupivacaine**  
 surgical analgesia for cesarean delivery with (CR) [Gaffud, Bansal, Lawton, Velasquez & Watson], 331  
 computer-assisted infusion of (CO) [Alvis, Jacobs & Reves], 345  
 computer-assisted infusion of (CO) [Maitre, Vozech & Stanski], 344

**diazepam**

- depresses ventilatory response to carbon dioxide (CO) [Bailey, Andriano, Goldman, Stanley & Pace], 348
- depresses ventilatory response to carbon dioxide (CO) [Gross], 348
- effects of chronic alcohol intake on anesthetic responses to, in rats (OA) [Newman, Curran & Becker], 196
- epidural injection of, neurologic changes following (CR) [Lin, Becker & Shapiro], 210

**droperidol**

- breathing pattern and thoraco-abdominal motion following (OA) [Morel, Forster & Gemperle], 392
- hypertensive response evoked by, dopaminergic receptor in adrenal medulla as site of action for (OA) [Montiel, Artalejo, Bermejo & Sánchez-García], 474

**etomidate**

- different methods of inducing, effect of, on intraocular pressure (CR) [Badrinath, Vazeery, McCarthy & Ivankovich], 431
- effects of, on upper extremity somatosensory evoked potentials in humans (OA) [McPherson, Sell & Traystman], 584
- increased sensitivity to, in elderly (OA) [Arden, Holley & Staniski], 19
- preservation of cerebral metabolites by, during incomplete cerebral ischemia (OA) [Milde & Milde], 272

**fentanyl**

- effects of, on upper extremity somatosensory evoked potentials in humans (OA) [McPherson, Sell & Traystman], 584
- failure of, to prevent postoperative paralytic ileus (OA) [Wallin, Cassuto, Högström, Rimbäck, Faxén & Tolleson], 292
- induction regimens for, effect of, on oxygen saturation in cyanotic congenital heart disease (CR) [Laisley, Burrows, Lerman & Roy], 673
- and low-dose naloxone administration, pulmonary edema following (CO) [Partridge & Ward], 709
- does not alter heat response of unmyelinated primary afferents in monkey (OA) [Raja, Meyer, Campbell & Khan], 468
- respiratory depression induced by, pulmonary edema resulting from nalbuphine reversal of (CO) [DesMarteau & Cassot], 237
- surgical analgesia for cesarean delivery with (CR) [Gaffud, Bansal, Lawton, Velasquez & Watson], 331

**ketamine**

- breathing pattern and thoraco-abdominal motion following (OA) [Morel, Forster & Gemperle], 392
- in comparative study of effects on systemic arterial oxygen saturation in children with cyanotic heart disease (CR) [Greeley, Bushman, Davis & Reves], 666
- different methods of inducing, effect of, on intraocular pressure (CR) [Badrinath, Vazeery, McCarthy & Ivankovich], 431
- induction regimens for, effect of, on oxygen saturation in cyanotic congenital heart disease (CR) [Laisley, Burrows, Lerman & Roy], 673
- ventilatory pattern and chest wall mechanics during, in humans (OA) [Mankikian, Cantineau, Sartene, Clergue & Viars], 492

**midazolam**

- is it desirable for sedation in parturients? (CO) [Camann, Cohen & Ostheimer], 441

**morphine**

- in children (OA) [Attia, Ecoffey, Sandouk, Gross & Samii], 590
- does not alter heat response of unmyelinated primary afferents in monkey (OA) [Raja, Meyer, Campbell & Khan], 468

**nalbuphine**

- reversal of fentanyl-induced respiratory depression, pulmonary edema resulting from (CO) [DesMarteau & Cassot], 237

**phenobarbital**

- effects on cerebral blood flow and metabolism in young and aged rats (OA) [Baughman, Hoffman, Miletich & Albrecht], 500

**sufentanil**

- plasma level assays, reliability of (CO) [Avram, Henthorn & Krejcie], 110
- plasma level assays, reliability of (CO) [Gandolfi, Cork & Levy], 112
- plasma level assays, reliability of (CO) [Heykants, Woestenborghs & Timmerman], 112

**thiopental**

- and barbiturate protection during bypass (CO) [Scheller, Drummond, Todd, Shapiro & Zornow], 230
- for cerebral resuscitation (CO) [Michenfelder], 235
- for cerebral resuscitation (CO) [Safar, Bleyaert, Detre, Moosy & Reinmuth], 234
- different methods of inducing, effect of, on intraocular pressure (CR) [Badrinath, Vazeery, McCarthy & Ivankovich], 431
- effects of chronic alcohol intake on anesthetic responses to, in rats (OA) [Newman, Curran & Becker], 196
- effects of, on upper extremity somatosensory evoked potentials in humans (OA) [McPherson, Sell & Traystman], 584
- induction regimens for, effect of, on oxygen saturation in cyanotic congenital heart disease (CR) [Laisley, Burrows, Lerman & Roy], 673

**local**

**bupivacaine**

- in alteration of effective refractory period temporal dispersion: relationship to ventricular arrhythmias (OA) [Kasten], 61
- cardiotoxicity induced by, is related to increased brain sensitivity (CO) [Morishima, Pedersen, Finster, Arthur & Covino], 346
- cardiotoxicity induced by, is related to increased brain sensitivity (CO) [Norris], 346
- cardiotoxicity-concentration or dose ? (CO) [Marx], 116
- dose-dependent effects of, on rat muscle arterioles (OA) [Johns, Seyde, DiFazio & Longnecker], 186
- experimental study on neurotoxicity of, clinical relevance of (CO) [Myers, Kalichman, Reisner & Powell], 341
- experimental study on neurotoxicity of, clinical relevance of (CO) [Selander], 340
- surgical analgesia for cesarean delivery with (CR) [Gaffud, Bansal, Lawton, Velasquez & Watson], 331
- uptake and distribution of, in fetal lambs (OA) [Kennedy, Miller, Bell, Doshi, deSousa, Kennedy, Heald & David], 247
- for urologic and upper abdominal surgery in infants and children (CR) [Ecoffey, Dubouset & Samii], 87

**chlorprocaine**

- neurotoxicity of (CO) [Cartwright], 119
- neurotoxicity of (CO) [Myers, Kalichman, Reisner & Powell], 119

**etidocaine**

- in alteration of effective refractory period temporal dispersion: relationship to ventricular arrhythmias (OA) [Kasten], 61
- experimental study on neurotoxicity of, clinical relevance of (CO) [Myers, Kalichman, Reisner & Powell], 341
- experimental study on neurotoxicity of, clinical relevance of (CO) [Selander], 340

**lidocaine**

- 20%, lethal/toxic injection of (CO) [Kempen], 564
- acceleration of epinephrine absorption by (CO) [Sosis & Temple], 103
- acceleration of epinephrine absorption by (CO) [Ueda], 104

- in alteration of effective refractory period temporal dispersion: relationship to ventricular arrhythmias (OA) [Kasten], 61
- dose-dependent effects of, on rat muscle arterioles (OA) [Johns, Seyde, DiFazio & Longnecker], 186
- and effect of intravenous epinephrine on uterine artery blood flow velocity in pregnant guinea pig (OA) [Chestnut, Weiner, Martin, Herrig & Wang], 633
- experimental study on neurotoxicity of, clinical relevance of (CO) [Myers, Kalichman, Reisner & Powell], 341
- experimental study on neurotoxicity of, clinical relevance of (CO) [Selander], 340
- pancuronium neuromuscular blockade in cats, edrophonium antagonizes (OA) [Carpenter & Mulroy], 506
- reproductive and teratogenic effects of, in Sprague-Dawley rats (OA) [Fujinaga & Mazze], 626
- mepivacaine**
- in alteration of effective refractory period temporal dispersion: relationship to ventricular arrhythmias (OA) [Kasten], 61
- technique for anesthesia of airway (CO) [Bourke], 230
- technique for anesthesia of airway (CO) [Rooney], 230
- tetracaine**
- experimental study on neurotoxicity of, clinical relevance of (CO) [Myers, Kalichman, Reisner & Powell], 341
- experimental study on neurotoxicity of, clinical relevance of (CO) [Selander], 340
- neurotoxicity of (CO) [Cartwright], 119
- neurotoxicity of (CO) [Myers, Kalichman, Reisner & Powell], 119
- nondepolarizing**
- in penetrating ocular injuries (CO) [Rich, Witherspoon, Morris & Feist], 108
- volatile**
- enflurane**
- and concentration *versus* partial pressure: which is important? (CO) [Eger], 122
- and concentration *versus* partial pressure: which is important? (CO) [Nakagawara, Yoshitake & Minakami], 123
- and concentration *versus* partial pressure: which is important? (CO) [Welch], 123
- effects on somatosensory evoked potentials in humans (OA) [Peterson, Drummond & Todd], 35
- effects on verapamil pharmacokinetics in dogs (OA) [Chelly, Hysing, Abernethy, Doursout & Merin], 266
- extent of metabolism of, in humans (OA) [Carpenter, Eger, Johnson, Unadkat & Sheiner], 201
- renal function in obese and nonobese Fischer 344 rats following exposure to (OA) [Rice & Fish], 28
- solubility in human tissues, effect of age on (LR) [Lerman, Schmitt-Bantel, Gregory, Willis & Eger], 307
- halothane**
- comparative study of direct cerebral vasodilating potencies of, in New Zealand white rabbit (OA) [Drummond, Todd, Scheller & Shapiro], 462
- in comparative study of effects on systemic arterial oxygen saturation in children with cyanotic heart disease (CR) [Greeley, Bushman, Davis & Reves], 666
- and concentration *versus* partial pressure: which is important? (CO) [Eger], 122
- and concentration *versus* partial pressure: which is important? (CO) [Nakagawara, Yoshitake & Minakami], 123
- and concentration *versus* partial pressure: which is important? (CO) [Welch], 123
- and effect of cardiac output on extravascular lung water measurements made with thermoconductivity method (LR) [Noble & Kay], 206
- effects on somatosensory evoked potentials in humans (OA) [Peterson, Drummond & Todd], 35
- effects on verapamil pharmacokinetics in dogs (OA) [Chelly, Hysing, Abernethy, Doursout & Merin], 266
- electrophysiologic effects of, on canine Purkinje fibers (OA) [Gallagher, Gessman, Moura & Kerns], 278
- epinephrine arrhythmogenicity enhanced by aminophylline administration during (OA) [Prokocimer, Nicholis, Gaba & Maze], 13
- extent of metabolism of, in humans (OA) [Carpenter, Eger, Johnson, Unadkat & Sheiner], 201
- and hypoxia effects of liver cells (OA) [Becker, Hensel, Holland, Miletich & Albrecht], 379
- induction regimens for, effect of, on oxygen saturation in cyanotic congenital heart disease (CR) [Lashley, Burrows, Lerman & Roy], 673
- does it really reduce diaphragmatic contractility? (CO) [Clergue & Aubier], 702
- does it really reduce diaphragmatic contractility? (CO) [Drummond], 701
- mode of action of, on histamine-induced airway constriction in dogs with reactive airways (OA) [Shah & Hirshman], 170
- requirements are not affected by aminophylline treatment in rats and dogs (OA) [Nicholis, Louie, Prokocimer & Maze], 637
- solubility in human tissues, effect of age on (LR) [Lerman, Schmitt-Bantel, Gregory, Willis & Eger], 307
- in study of electrical correlates of brain injury resulting from severe hypotension and hemodilution in monkeys (OA) [Dong, Bledsoe, Chadwick, Shaw & Hornbein], 617
- in study of pharmacology of laudanoline in dogs (OA) [Hennis, Fahey, Canfell, Shi & Miller], 56
- isoflurane**
- comparative study of direct cerebral vasodilating potencies of, in New Zealand white rabbit (OA) [Drummond, Todd, Scheller & Shapiro], 462
- and concentration *versus* partial pressure: which is important? (CO) [Eger], 122
- and concentration *versus* partial pressure: which is important? (CO) [Nakagawara, Yoshitake & Minakami], 123
- and concentration *versus* partial pressure: which is important? (CO) [Welch], 123
- effects on local cerebral glucose utilization in rat (OA) [Ori, Dam, Pizzolato, Battistin & Giron], 152
- effects on somatosensory evoked potentials in humans (OA) [Peterson, Drummond & Todd], 35
- effects on verapamil pharmacokinetics in dogs (OA) [Chelly, Hysing, Abernethy, Doursout & Merin], 266
- effects on visual evoked potentials in humans (CR) [Chi & Field], 328
- extent of metabolism of, in humans (OA) [Carpenter, Eger, Johnson, Unadkat & Sheiner], 201
- hemodynamic interactions of, with nicardipine (OA) [Hysing, Chelly, Doursout, Hartley & Merin], 385
- and hypocapnia, in dogs, cerebral metabolism and EEG during combination of (OA) [Artru], 602
- local cerebral blood flow and glucose utilization during (OA) [Maekawa, Tommasino, Shapiro, Keifer-Goodman & Kohlenberger], 144
- renal function in obese and nonobese Fischer 344 rats following exposure to (OA) [Rice & Fish], 28

- solubility in human tissues, effect of age on (LR) [Lerman, Schmitt-Bantel, Gregory, Willis & Eger], 307
- methoxyflurane**  
extent of metabolism of, in humans (OA) [Carpenter, Eger, Johnson, Unadkat & Sheiner], 201  
solubility in human tissues, effect of age on (LR) [Lerman, Schmitt-Bantel, Gregory, Willis & Eger], 307
- Anesthetists, See under Manpower**
- Animal rights, See under Research**
- Antagonists**  
**narcotic**  
**nalbuphine**  
reversal of fentanyl-induced respiratory depression, pulmonary edema resulting from (CO) [DesMarteau & Cassot], 237  
**naloxone**  
low-dose, lack of reversal of nitrous oxide analgesia by (CO) [Gillman], 449  
low-dose, pulmonary edema following (CO) [Partridge & Ward], 709  
**neuromuscular relaxants**  
and neuromuscular blocking drugs, are studies of, unnecessarily confusing? (EV) [Miller], 569
- Antibiotics**  
**amikacin**  
sternal irrigation, recurrence of neuromuscular blockade after reversal of vecuronium in (CR) [Kronenfeld, Thomas & Turndorf], 93  
**polymyxin**  
sternal irrigation, recurrence of neuromuscular blockade after reversal of vecuronium in (CR) [Kronenfeld, Thomas & Turndorf], 93
- Anticonvulsants**  
**diphenylhydantoin**  
prevention of succinylcholine-evoked fasciculations by (OA) [Hartman, Fiamengo & Riker], 405  
**phenytoin**  
prevention of succinylcholine-evoked fasciculations by (OA) [Hartman, Fiamengo & Riker], 405
- Antiemetics, See under Vomiting**
- Apnea, See under Complications; Ventilation**
- Arm supports, See under Equipment**
- Arrhythmia, See under Complications; Heart**
- Arterial pressure measurements, See under Measurement techniques**
- Arteries**  
**abdominal aorta**  
major surgery on, effects of renal sympathetic blockade on renal hemodynamics in patients undergoing (CR) [Gamulin, Forster, Simonet, Aymon & Favre], 688  
**arterioles**  
rat muscle, dose-dependent effects of bupivacaine on (OA) [Johns, Seyde, DiFazio & Longnecker], 186  
**cannulation**  
pulse oximeter in (CO) [Introna & Silverstein], 342  
**carotid**  
assessment of effects of interaction of nicardipine and isoflurane on (OA) [Hysing, Chelly, Doursout, Hartley & Merin], 385  
**dorsalis pedis**  
direct blood pressure measurements at, in comparative study during sodium nitroprusside- and isoflurane-induced hypotension (CR) [Abou-Madi, Lenis, Archer, Ravussin & Trop], 692  
**microcirculation**  
rat muscle, dose-dependent effects of bupivacaine on (OA) [Johns, Seyde, DiFazio & Longnecker], 186  
**pseudoaneurysm**  
traumatic of pulmonary artery: anesthetic considerations (CR) [DiNardo], 334  
**pulmonary**  
traumatic pseudoaneurysm of: anesthetic considerations (CR) [DiNardo], 334  
**radial**  
direct blood pressure measurements at, in comparative study during sodium nitroprusside- and isoflurane-induced hypotension (CR) [Abou-Madi, Lenis, Archer, Ravussin & Trop], 692
- Arterioles, See under Arteries; Microcirculation**
- Arthroscopy, See under Surgery**
- Artificial ventilation, See under Ventilation**
- Aspiration, See under Airway; Complications; Lung(s)**
- Asthma, See under Complications; Lung(s)**
- Atlee, J. L., III,**  
*Perioperative Cardiac Dysrhythmias* (BR), 135
- Atracurium, See under Muscle relaxants; Neuromuscular relaxants; Pharmacokinetics; Metabolism**
- Atropine, See under Parasympathetic nervous system**
- Award**  
**research**  
**ASA**  
for excellence in research (EV) [Saidman], 359  
John Severinghaus is inaugural recipient (SA) [Hornbein], 360
- Axillary sheath, See under Equipment**
- B**
- Bigelow, W. G.**  
*Cold Hearts: The Story of Hypothermia and the Pacemakers in Heart Surgery* (BR), 352
- Biomedical research, See under Research**
- Biotransformation**  
enflurane or isoflurane, in obese and nonobese Fischer 344 rats (OA) [Rice & Fish], 28
- Blockage of breathing system, See under Complications**
- Blood**  
**glucose**  
perioperative, concentrations of, in pediatric outpatients (CR) [Welborn, McGill, Hannallah, Nisselson, Ruttimann & Hicks], 543  
**hematocrit**  
and electrical correlates of brain injury resulting from severe hypotension, in monkeys (OA) [Dong, Bledsoe, Chadwick, Shaw & Hornbein], 617  
**isovolemic hemodilution**  
and electrical correlates of brain injury resulting from severe hypotension, in monkeys (OA) [Dong, Bledsoe, Chadwick, Shaw & Hornbein], 617  
**platelets**  
and malignant hyperthermia (CO) [Edwards & Adragna], 100  
and malignant hyperthermia (CO) [Solomons], 100  
**volume**  
and electrical correlates of brain injury resulting from severe hypotension, in monkeys (OA) [Dong, Bledsoe, Chadwick, Shaw & Hornbein], 617
- Blood embolism, See under Embolism**
- Blood flow, See also under specific organs; Brain; Heart; Kidney**  
**regional**  
during high-frequency ventilation at low and high airway pressure in dogs (OA) [Gioia, Harris, Traystman & Rogers], 50
- Blood flow velocity, uterine, See under Uterus**

**Blood patch, See under Complications****Blood pressure****drug effects**

and hypertension from smokeless tobacco (CO) [Wells & Rustick], 339

**hypertension**

during endotracheal intubation in patients undergoing carotid endarterectomy, evaluation of esmolol in controlling (CR) [Cucchiara, Benefiel, Matteo, DeWood & Albin], 528  
from smokeless tobacco (CO) [Wells & Rustick], 339

**hypotension**

preservation of cerebral metabolites by etomidate during (OA) [Milde & Milde], 272

**trimethaphan**

electrical correlates of brain injury resulting from, in monkeys (OA) [Dong, Bledsoe, Chadwick, Shaw & Hornbein], 617

**tobacco**

and hypertension from smokeless tobacco (CO) [Wells & Rustick], 339

**Blood warming devices, See under Equipment****Book reviews**

- Atlee, J. L., III, *Perioperative Cardiac Dysrhythmias*, 135  
Bigelow, W. G., *Cold Hearts: The Story of Hypothermia and the Pacemaker in Heart Surgery*, 352  
Churchill-Davidson, H. C. (ed.), *A Practice of Anesthesia*, 242  
Don, H., *Decision Making in Critical Care*, 135  
Hoffer, E. P., and Barnett, G. O., *Arterial Blood Gases* (computer software package), 454  
Jokl, E., *Sudden Death in Athletes*, 454  
Ostheimer, G. W. (ed.), *Manual of Obstetric Anesthesia*, 568  
Pohost, G. M., Higgins, C. B., Morganroth, J., Richie, J. L., and Schelbert, H. R. (eds.), *New Concepts in Cardiac Imaging*, 135  
Rogers, M. C. (ed.), *1985 Yearbook of Critical Care Medicine*, 352  
Widmann, F. K. (ed.), *Technical Manual of the American Association of Blood Banks*, 242

**Bowel motility, See under Gastrointestinal tract****Bradycardia, See under Heart****Brain****blood**

effects of succinylcholine on, is different in humans than in dogs (CO) [Lanier, Milde & Michenfelder], 452  
effects of succinylcholine on, is different in humans than in dogs (CO) [Merin], 452

**blood flow**

and direct cerebral vasodilating potencies of halothane and isoflurane, compared, in New Zealand white rabbit (OA) [Drummond, Todd, Scheller & Shapiro], 462  
effects of phenobarbital on, in young and aged rats (OA) [Baughman, Hoffman, Miletich & Albrecht], 500  
during high-frequency ventilation at low and high airway pressure in dogs (OA) [Gioia, Harris, Traystman & Rogers], 50

**electroencephalogram**

in brain injury resulting from severe hypotension and hemodilution in monkeys (OA) [Dong, Bledsoe, Chadwick, Shaw & Hornbein], 617  
effects of succinylcholine on, is different in humans than in dogs (CO) [Lanier, Milde & Michenfelder], 452  
effects of succinylcholine on, is different in humans than in dogs (CO) [Merin], 452

**electroencephalography**

in assessment of sensitivity to etomidate in elderly (OA) [Arden, Holley & Stanski], 19  
during combination of hypocapnia and isoflurane-induced hypotension in dogs (OA) [Artru], 602

**evoked potentials**

in brain injury resulting from severe hypotension and hemodilution in monkeys (OA) [Dong, Bledsoe, Chadwick, Shaw & Hornbein], 617

**glucose utilization**

effects of isoflurane on, in rat (OA) [Ori, Dam, Pizzolato, Battistin & Giron], 152  
during isoflurane anesthesia in rat (OA) [Maekawa, Tommasino, Shapiro, Keifer-Goodman & Kohlenberger], 144

**intracranial pressure**

effects of succinylcholine on, is different in humans than in dogs (CO) [Lanier, Milde & Michenfelder], 452  
effects of succinylcholine on, is different in humans than in dogs (CO) [Merin], 452  
increases in, from succinylcholine (OA) [Minton, Grosslight, Stirt & Bedford], 165

**metabolism**

during combination of hypocapnia and isoflurane-induced hypotension in dogs (OA) [Artru], 602  
and direct cerebral vasodilating potencies of halothane and isoflurane, compared, in New Zealand white rabbit (OA) [Drummond, Todd, Scheller & Shapiro], 462  
effects of phenobarbital on, in young and aged rats (OA) [Baughman, Hoffman, Miletich & Albrecht], 500  
effects of succinylcholine on, is different in humans than in dogs (CO) [Lanier, Milde & Michenfelder], 452  
effects of succinylcholine on, is different in humans than in dogs (CO) [Merin], 452  
and preservation of cerebral metabolites by etomidate during incomplete cerebral ischemia in dogs (OA) [Milde & Milde], 272

**regional**

effects of isoflurane on, in rat (OA) [Ori, Dam, Pizzolato, Battistin & Giron], 152  
during isoflurane anesthesia in rat (OA) [Maekawa, Tommasino, Shapiro, Keifer-Goodman & Kohlenberger], 144  
during isoflurane anesthesia in rat (OA) [Maekawa, Tommasino, Shapiro, Keifer-Goodman & Kohlenberger], 144

**neuropathology**

in brain injury resulting from severe hypotension and hemodilution in monkeys (OA) [Dong, Bledsoe, Chadwick, Shaw & Hornbein], 617

**oxygen consumption, See also under Oxygen**

and direct cerebral vasodilating potencies of halothane and isoflurane, compared, in New Zealand white rabbit (OA) [Drummond, Todd, Scheller & Shapiro], 462  
effects of succinylcholine on, is different in humans than in dogs (CO) [Lanier, Milde & Michenfelder], 452  
effects of succinylcholine on, is different in humans than in dogs (CO) [Merin], 452

**protection**

barbiturates for (CO) [Michenfelder], 235  
barbiturates for (CO) [Safar, Bleyaert, Detre, Moosy & Reinmuth], 234  
during bypass, recommendations regarding (CO) [Scheller, Drummond, Todd, Shapiro & Zornow], 230  
in cardiopulmonary bypass, barbiturate and (CO) [Michenfelder], 232  
in cardiopulmonary bypass, barbiturate and (CO) [Shanks, Harter & Brunner], 232  
in cardiopulmonary bypass, barbiturate and (CO) [Slogoff, Nussmeier & Arlund], 233  
and preservation of cerebral metabolites by etomidate during in-



complete cerebral ischemia in dogs (OA) [Milde & Milde], 272

**sensitivity**

increased, bupivacaine cardiotoxicity is related to (CO) [Morishima, Pedersen, Finster, Arthur & Covino], 346

increased, bupivacaine cardiotoxicity is related to (CO) [Norris], 346

**stroke**

during bypass, recommendations regarding (CO) [Scheller, Drummond, Todd, Shapiro & Zornow], 230

in cardiopulmonary bypass, barbiturate and (CO) [Michenfelder], 232

in cardiopulmonary bypass, barbiturate and (CO) [Shanks, Harter & Brunner], 232

in cardiopulmonary bypass, barbiturate and (CO) [Slogoff, Nussemer & Arlund], 233

**Brain death, See under Medicolegal**

**Breast Surgery, See under Surgery**

**Breathing pattern, See under Ventilation**

**Brody's equation**

for calculation of oxygen uptake in closed circuit anesthesia (CO) [Frenette, Baillargeon & Perreault], 704

**Bronchoconstriction, See under Complications**

**Bronchoscopes, See under Equipment**

**Bronchoscopy, See under Anesthetic techniques; Surgery**

**Bronchus, See under Lung(s)**

**Bupivacaine, See under Anesthetics, intravenous; Anesthetics, local**

**Burns, See under Complications**

anesthesia in, *See under Anesthesia*

C

**Calcium blockers, See under Ions**

**Calcium channel blocker, See under Pharmacology**

**Calcium, See under Ions**

**Cannulation, See under Arteries; Veins**

**Capillary gas chromatography, See under Measurement techniques**

**Carbon dioxide**

**end-tidal**

sudden drop or rise in, as early warning sign of accidental endobronchial intubation (CO) [Gandhi, Munshi & Kampine], 114

sudden drop or rise in, as early warning sign of accidental endobronchial intubation (CO) [Riley, Finucane & Marcy], 115

**hypocapnia**

and isoflurane-induced hypotension in dogs, cerebral metabolism and EEG during combination of (OA) [Artru], 602

**production**

and measured *versus* predicted metabolic rate (CO) [Long], 707

and measured *versus* predicted metabolic rate (CO) [Weissman], 708

**sampling**

frequency response of long mass-spectrometer catheters in (LR) [Scamman & Fishbaugh], 422

**tension**

**monitoring of**

during bronchoscopy in infant with airway obstruction (CO) [Weinberg & Werbin], 703

**ventilatory response**

diazepam depresses (CO) [Bailey, Andriano, Goldman, Stanley & Pace], 348

diazepam depresses (CO) [Gross], 348

**Carbon dioxide response, See under Ventilation**

**Cardiac anesthesia, See under Anesthesia**

**Cardiac arrest, See under Complications**

**Cardiac conduction, See under Heart**

**Cardiac output measurements, See under Measurement techniques**

**Cardiac output, See under Heart**

**Cardiopulmonary bypass, See under Surgery, cardiac**

**Cardiopulmonary resuscitation, See under Heart; Resuscitation**

**Cardiotoxicity, See under Heart**

**Cardiovascular anesthesia, See under Anesthesia**

**Cardiovascular performance, See under Ions, calcium**

**Cardiovascular surgery, See under Surgery**

**Carotid arteries, See under Arteries**

**Carotid endarterectomy, See under Surgery**

**Catecholamine release, See under Sympathetic nervous system**

**Catecholamines, See under Sympathetic nervous system**

**Catheter disruption, See under Complications**

**Catheters, See under Equipment**

misplaced, *See under Complications*

**Central nervous system**

laudanosine

pharmacology of, in dogs (OA) [Hennis, Fahey, Canfell, Shi & Miller], 56

metabolism, *See under Metabolism*

**Central nonadrenergic transmission, See under Sympathetic nervous system**

**Central venous cannula system, See under Equipment**

**Central venous monitoring, See under Monitoring**

**Cerebral blood flow, See under Brain**

**Cerebral glucose utilization, See under Brain**

**Cerebral protection, See under Brain**

**Cerebrospinal fluid**

laudanosine

pharmacology of, in dogs (OA) [Hennis, Fahey, Canfell, Shi & Miller], 56

**Cesarean section, See under Anesthesia, obstetric**

**C-fibers, See under Nerve(s)**

**Charcoal canister, See under Equipment**

**Chloroprocain, See under Anesthetics, local**

**Cholecystectomy, See under Surgery, abdominal**

**Cholinesterase, See under Enzymes**

**Chromatography, See under Measurement techniques**

**Churchill-Davidson, H. C. (ed.)**

*A Practice of Anaesthesia* (BR), 242

**Cimetidine, See under Complications; Pharmacokinetics; Pharmacology**

**Circuits, See under Equipment**

**Circulation**

**heart rate**

and effect of anesthetic induction regimens on oxygen saturation in cyanotic congenital heart disease (CR) [Laisley, Burrows, Lerman & Roy], 673

**systolic blood pressure**

and effect of anesthetic induction regimens on oxygen saturation in cyanotic congenital heart disease (CR) [Laisley, Burrows, Lerman & Roy], 673

**Citrate, See under Liver; Transfusions**

**Clonidine, See under Pharmacology; Sympathetic nervous system**

**Closed circuit anesthesia, See under Anesthetic techniques**

**Closed circuits, See under Equipment**

**Codeine, See under Analgesics**

**Colon**

**gastrointestinal motility**

and failure of epidural anesthesia to prevent postoperative paralytic ileus (OA) [Wallin, Cassuto, Högström, Rimbäck, Faxén & Tollesson], 292

**Compliance, pulmonary, See under Lung(s)**

**Complications**

- airway resistance**  
histamine-induced in dogs with reactive airways, mode of action of halothane on (OA) [Shah & Hirshman], 170
- apnea**  
postanesthetic, in infants (CR) [Welborn, Ramirez, Oh, Ruttimann, Fink, Guzzetta & Epstein], 658
- arrhythmia**  
relationship of amide local anesthetic alterations of effective refractory period temporal dispersion to (OA) [Kasten], 61
- aspiration**  
acid, prophylactic intravenous cimetidine reduces risk of, in morbidly obese patients (CR) [Lam, Grace, Penny & Vezina], 684  
and dose-response effects of intravenous ranitidine on gastric pH and volume in outpatients (OA) [Manchikanti, Colliver, Grow, Demeyer, Hadley & Roush], 180
- asthma**  
and action of halothane on histamine-induced airway constriction in dogs (OA) [Shah & Hirshman], 170
- blockage of breathing system**  
anesthesia system malfunction in (CO) [Riddle], 563  
anesthesia system malfunction in (CO) [Springman & Malischke], 563
- blood patch**  
**epidural**  
in treatment of chronic headaches (CO) [Parris], 344
- bronchoconstriction**  
histamine-induced, in dogs with reactive airways, mode of action of halothane on (OA) [Shah & Hirshman], 170
- burns**  
**airway**  
in use of endotracheal tubes during Nd-YAG laser application in airway (LR) [Geffin, Shapshay, Bellack, Hobin & Setzer], 511  
**response to neuromuscular relaxants**  
patients with, are resistant to atracurium (CR) [Dwersteg, Pavlin & Heimbach], 517
- cardiac arrest**  
bupivacaine-associated (CO) [Marx], 116  
during cemented total knee replacement (CR) [Byrick, Forbes & Waddell], 213  
and cerebral resuscitation with barbiturates (CO) [Michenfelder], 235  
and cerebral resuscitation with barbiturates (CO) [Safar, Bleyaert, Detre, Moossy & Reinmuth], 234
- equipment**  
organization of emergency airway management kit (CO) [Jesudian & Estes], 127
- catheter disruption**  
with Arrow-Racz epidural catheter (CO) [Ellis & Ramamurthy], 124  
with Arrow-Racz epidural catheter (CO) [Frankhouser], 125
- cimetidine**  
intravenous, hypotension after, in intensive care unit patients (CO) [Guay & Matzke], 130  
intravenous, hypotension after, in intensive care unit patients (CO) [Iberti], 131
- drug pooling**  
with Paceport™ Swan-Ganz catheter during cardiopulmonary bypass (CO) [Dodson, Larach & Hensley], 113
- dysrhythmias**  
associated with extracorporeal shock wave lithotripsy (CR) [Walts & Atlee], 521
- explosions**  
in use of endotracheal tubes during Nd-YAG laser application in airway (LR) [Geffin, Shapshay, Bellack, Hobin & Setzer], 511
- Fabella syndrome**  
common peroneal nerve palsy associated with (CR) [Kubota, Toyoda, Kubota, Kawai & Yamamoto], 552
- fire**  
endotracheal tube, ignited by pharyngeal electrocautery (CR) [Simpson & Wolf], 76
- headaches**  
chronic, epidural blood patch in treatment of (CO) [Parris], 344  
postlumbar puncture, in pediatric oncology patients (CR) [Bolder], 696
- hepatotoxicity**  
in rats exposed to halothane and hypoxia *in vitro* (OA) [Becker, Hensel, Holland, Miletich & Albrecht], 379
- hyperalgesia**  
in patient receiving high concentrations of spinal morphine (CO) [Ali], 449
- hypertension**  
following cessation of clonidine therapy (CO) [Hosking], 128  
following cessation of clonidine therapy (CO) [Johnston, Nicholas, Lawson, Wallfisch & Arens], 129  
rebound, for clonidine withdrawal in perioperative period (CO) [Bernstein], 451  
from smokeless tobacco (CO) [Wells & Rustick], 339
- hypocalcemia**  
ionic, cardiovascular depression secondary to, during hepatic transplantation in humans (OA) [Marquez, Martin, Virji, Kang, Warty, Shaw, Sassano, Waterman, Winter & Pinsky], 457
- hypoventilatory hazard**  
of anesthetic scavenging device (CO) [Choi, Guida & Wu], 126
- hypoxemia**  
and dilution of anesthetic gases by new light source for bronchoscopy (CO) [Berci & MacDonald], 446  
and dilution of anesthetic gases by new light source for bronchoscopy (CO) [Mostello & Patel], 445  
in one-lung anesthesia with recent pulmonary embolism of ventilated lung (CR) [Vaghadia & Doll], 98
- hypoxia**  
caused by esophageal stethoscope (CR) [Pickard & Reid], 534
- hypoxic gas mixtures**  
and fail-safe oxygen analyzers (CO) [Baumgarten], 129
- intravascular injection**  
in simultaneous recording of maternal and fetal heart rate (CO) [Abouleish & Johnson], 558  
in simultaneous recording of maternal and fetal heart rate (CO) [Chestnut & Weiner], 558
- misplaced catheters**  
epidural (CR) [Koch & Nielsen], 556
- muscle weakness**  
induced by oral dantrolene sodium prophylaxis for malignant hyperthermia (CR) [Watson, Reiersen & Norfleet], 312
- myasthenia gravis**  
predicting need for postoperative mechanical ventilation in (CR) [Eisenkraft, Papatestas, Kahn, Mora, Fagerstrom & Jenkins], 79
- myocardial ischemia**  
perioperative, further observations on (CR) [Slogoff & Keats], 539
- obesity**  
morbid, prophylactic intravenous cimetidine reduces risk of acid aspiration in (CR) [Lam, Grace, Penny & Vezina], 684

**obstruction**  
of anesthetic circuit limb, by foreign body abutting upon monitor sensor (CO) [Hindman & Sperring], 349

**paralysis**  
following epidural injection of potassium chloride and diazepam (CR) [Lin, Becker & Shapiro], 210  
following intercostal nerve block (CR) [Gauntlett], 82

**periodic breathing**  
postanesthetic, in infants (CR) [Welborn, Ramirez, Oh, Ruttimann, Fink, Guzzetta & Epstein], 658

**peripheral nerve damage**  
lower lip numbness in, following general anesthesia (CO) [Azar & Lear], 450

**phantom limb pain**  
and epidural anesthesia for cesarean section [Carrie & Glynn], 220

**pneumonitis**  
and dose-response effects of intravenous ranitidine on gastric pH and volume in outpatients (OA) [Manchikanti, Colliver, Grow, Demeyer, Hadley & Roush], 180

**preeclampsia**  
nifedipine or verapamil counteracts hypertension in gravid ewes (OA) [Norris, Rose & Dewan], 254

**pruritus**  
nalbuphine augmentation of analgesia and reversal of, following epidural hydromorphone (CR) [Henderson & Cohen], 216

**pulmonary edema**  
following acute upper airway obstruction (CO) [Frank & Schreiber], 106  
following low-dose naloxone administration (CO) [Partridge & Ward], 709  
from nalbuphine reversal of fentanyl-induced respiratory depression (CO) [DesMarteau & Cassot], 237

**renal failure**  
serum sufentanil levels in, assay for, is not sensitive (CO) [Avram, Henthorn & Krejcie], 110  
serum sufentanil levels in, assay for, is not sensitive (CO) [Gandolfi, Cork & Levy], 112  
and sufentanil plasma levels (CO) [Heykants, Woestenborghs & Timmerman], 112

**respiratory failure**  
postoperative, sufentanil plasma levels and (CO) [Heykants, Woestenborghs & Timmerman], 112

**trauma**  
ocular, penetrating, nondepolarizing anesthetic agents in (CO) [Rich, Witherspoon, Morris & Feist], 108

**Computers, See under Equipment; Monitoring**

**Conduction, See under Heart**

**Congenital cardiac defects, See under Heart**

**Continuous axillary block, See under Anesthetic techniques, regional**

**Continuous flow apneic ventilation, See under Anesthetic techniques**

**Continuous positive airway pressure, See under Ventilation**

**Continuous positive pressure breathing, See under Ventilation**

**D**

**D-Ala<sup>2</sup>-D-Leu<sup>5</sup>-enkephalin, See under Analgesics, peptides**

**Dantrolene, See under Neuromuscular relaxants**

**Decreased central volume, See under Kidney, failure**

**Dexamethasone, See under Hormones**

**Diaphragm, See under Muscle, skeletal**

**Diazepam, See under Anesthetics, intravenous; Tolerance**

**Diet**  
**high diet**  
in Fischer 344 rats, enflurane or isoflurane following, anesthetic metabolism and renal function in (OA) [Rice & Fish], 28

**Dihydropyridine derivative**  
**nicardipine, See under Ions, calcium channel blockers**

**Diphenylhydantoin, See under Anticonvulsants**

**Don, H.,**  
*Decision Making in Critical Care* (BR), 135

**Dopaminergic receptors, See under Sympathetic nervous system**

**Doppler flow probe, See under Measurement techniques**

**Dorsalis pedis, See under Arteries**

**Down's syndrome, See under Heart, congenital defects**

**Propofol, See under Anesthetics, intravenous; Vomiting**

**Drug abuse**  
departmental policy addressing (SA) [Lecky, Aukburg, Conahan, Geer, Ominsky, Gross, Muravchick & Wollman], 414

**Drug interactions, See also under Interactions; Pharmacology**

**lidocaine**  
-pancuronium neuromuscular blockade in cats, edrophonium antagonizes (OA) [Carpenter & Mulroy], 506

**pancuronium**  
combined with lidocaine or verapamil for neuromuscular blockade in cats, edrophonium antagonizes (OA) [Carpenter & Mulroy], 506

**verapamil**  
-pancuronium neuromuscular blockade in cats, edrophonium antagonizes (OA) [Carpenter & Mulroy], 506

**Drug pooling, See under Complications**

**Drug therapy**  
with Paceport™ Swan-Ganz catheter during cardiopulmonary bypass (CO) [Dodson, Larach & Hensley], 113

**Drug(s)**  
**metabolism, See under Metabolism**  
**recovery, See under Recovery**

**d-Tubocurarine, See under Neuromuscular relaxants**

**Dutch-Kentucky syndrome, See under Genetic factors**

**Dysrhythmias, See under Complications; Heart**

**E**

**Echocardiography, See under Heart; Monitoring**

**Eclampsia, See under Anesthesia, obstetric**

**Edema, See under Complications**

**Edrophonium, See under Neuromuscular antagonists**

**Education**  
biomedical research in, animal welfare and (CO) [Rackow], 442

**residents**  
attributes wanted in (CO) [Springman, Berry, Cascorbi, Kaplan & Schneider], 107

**Elderly, See under Age factors**

**Electrical systems**  
**electrocautery**  
pharyngeal, endotracheal tube fire ignited by (CR) [Simpson & Wolf], 76

**Electrocardiography, See under Heart; Monitoring**

**Electrocautery, See under Electrical systems**

**Electroencephalogram, See under Brain**

**Electroencephalography, See under Brain**

**Electromyography, See under Monitoring**

**Embolism**  
**air**  
massive, during cesarean section (CR) [Yunker, Rodriguez & Kavanagh], 77  
and sources of nitrogen in anesthesia circuit (CO) [Matjasko, Gunselman, Delaney & Mackenzie], 229  
venous, and cardiac arrest during craniectomy in spine infant (CR) [Harris, Strafford, Rowe, Sanders, Winston & Rockoff], 547

- blood**  
cardiovascular collapse in, during cemented total knee replacement (CR) [Byrick, Forbes & Waddell], 213
- fat**  
cardiovascular collapse in, during cemented total knee replacement (CR) [Byrick, Forbes & Waddell], 213
- thromboembolism**  
recent pulmonary, of ventilated lung, one-lung anesthesia with (CR) [Vaghadia & Doll], 98
- Endobronchial insufflation, See under Anesthetic techniques**
- Endobronchial intubation, See under Anesthetic techniques**
- Endobronchial tubes, See under Equipment**
- Endotracheal intubation, See under Intubation**
- Endotracheal technique, See under Intubation**
- Endotracheal tubes, See under Equipment, tubes**
- End-tidal carbon dioxide, See under Carbon dioxide**
- End-tidal nitrogen, See under Gases**
- Enflurane, See under Anesthetics, volatile; Metabolism**
- Enzymatic measurement methods, See under Measurement techniques**
- Enzymes**
- cholinesterase**  
serum, assay of, with succinylcholine (CO) [George, Abernethy & Herron], 104  
serum, assay of, with succinylcholine (CO) [Wakid, Tubbeh & Baraka], 105
- Epidural anesthesia, See under Anesthetic techniques**
- Epidural blood patch, See under Complications**
- Epidural narcotic anesthesia, See under Anesthetic techniques, epidural**
- Epinephrine**  
**racemic, See under Pharmacology**
- Epinephrine, See under Sympathetic nervous system, catecholamines**
- Equipment**
- absorber**  
for removal of volatile anesthetic agents from breathing circuit in malignant hyperthermia (CO) [Greene], 240
- anesthesia**  
and a cause of breathing system leak during closed circuit anesthesia (CR) [Ferderbar, Kettler, Jablonski & Sportiello], 661
- anesthesia machines**  
malfunctioning, excessive airway pressure due to (CR) [Roth, Tweedie & Sommer], 532
- arm supports**  
for support of arms during EWSL (CO) [Jones, Zornow & Sarnat], 341
- axillary sheath**  
transarterial, distention, as aid to catheter placement (CO) [Moore & Cockings], 131
- catheters(s)**
- peridural**  
Arrow-Racz, problems with (CO) [Ellis & Ramamurthy], 124  
Arrow-Racz, problems with (CO) [Frankhouser], 125  
placement of, transarterial axillary sheath as aid to (CO) [Moore & Cockings], 131
- sampling**  
long mass-spectrometer, frequency response of (LR) [Scamman & Fishbaugh], 422
- Swan-Ganz**  
Paceport™, drug infusion with, during cardiopulmonary bypass (CO) [Dodson, Larach & Hensley], 113
- central venous cannula system**  
new and efficient (CO) [Ellermeyer & Keifer], 341
- charcoal canister**  
for removal of volatile anesthetic agents from breathing circuit in malignant hyperthermia (CO) [Greene], 240
- circuits**  
and a cause of breathing system leak during closed circuit anesthesia (CR) [Ferderbar, Kettler, Jablonski & Sportiello], 661
- closed**  
sources of nitrogen in (CO) [Matjasko, Gunselman, Delaney & Mackenzie], 229
- expiratory limb**  
partial obstruction of, by foreign body abutting upon monitor sensor (CO) [Hindman & Sperring], 349
- semi-open**  
potentially serious anesthesia system malfunction with (CO) [Riddle], 563  
potentially serious anesthesia system malfunction with (CO) [Springman & Malischke], 563
- esophageal stethoscope**  
additional use for (CO) [Shah & Nossaman], 453
- exhaust systems**  
for scavenging exhaled nitrous oxide (CR) [Nitka, O'Riordan & Julien], 314
- fiberoptic bronchoscope**  
in approach to problem airway (CO) [Lu, Frost & Goldiner], 101  
new light source with, dilution of anesthetic gases by (CO) [Berci & MacDonald], 446  
new light source with, dilution of anesthetic gases by (CO) [Mottello & Patel], 445  
pediatric, another use for suction port on (CO) [Rosen, Rosen & Nahrwold], 116  
single-channel, topicalization, oxygenation, and suction *via* (CO) [Norley & Lander], 116
- fluid warmers**  
do not guarantee temperature homeostasis (CO) [Vaghadia], 237
- hoses**  
and wires, wrapping of, in operating room (CO) [McMahon], 241
- laryngoscope**  
handle malfunction (CO) [Rocco, Chatwani & Shupak], 107  
modification of technique of use of (CO) [King, Wang & Khan], 566
- laser**
- Nd-YAG**  
in airway, flammability of endotracheal tubes during (LR) [Gefin, Shapshay, Bellack, Hobin & Setzer], 511
- machines**  
and a cause of breathing system leak during closed circuit anesthesia (CR) [Ferderbar, Kettler, Jablonski & Sportiello], 661
- anesthesia**  
potentially serious malfunction of (CO) [Riddle], 563  
potentially serious malfunction of (CO) [Springman & Malischke], 563
- mass spectrometer**  
and sources of nitrogen in anesthesia circuit (CO) [Matjasko, Gunselman, Delaney & Mackenzie], 229
- monitoring, See under Monitoring**
- monitors**  
sensor of, foreign body abutting upon, partial expiratory limb obstruction by (CO) [Hindman & Sperring], 349
- nasal airway**  
in approach to problem airway (CO) [Lu, Frost & Goldiner], 101
- nebulizer**  
for anesthesia circuit (CO) [Bush], 240
- nerve stimulator**  
in simple technique for remote monitoring of neuromuscular blockade (CO) [Smith & Greenwalt], 562
- oxygen analyzers**  
fail-safe (CO) [Baumgarten], 129

- patient warmer**  
for maintaining body temperature in children (CO) [Nightingale & Meakin], 447
- pulse oximeter**  
and effects of intravenously administered dyes on pulse oximetry readings (CR) [Scheller, Unger & Kelner], 550  
finger probe, cost-saving method of modifying (CO) [Tharp], 446  
spurious desaturation with methylene blue injection (CR) [Kessler, Eide, Humayun & Poppers], 435  
utility of, during cardiopulmonary resuscitation (CO) [Narang], 239
- pump**  
**osmotic**  
in study of reproductive and teratogenic effects of lidocaine in Sprague-Dawley rats (OA) [Fujinaga & Mazze], 626
- resuscitation**  
organization of emergency airway management kit (CO) [Jesudian & Estes], 127
- scavenger**  
hypoventilatory hazard of (CO) [Choi, Guida & Wu], 126
- soda lime canister**  
for removal of volatile anesthetic agents from breathing circuit in malignant hyperthermia (CO) [Greene], 240
- stethoscope**  
**esophageal**  
hypoxia caused by (CR) [Pickard & Reid], 534
- temperature blanket**  
for maintaining body temperature in children (CO) [Nightingale & Meakin], 447
- tubes**  
**endobronchial**  
double-lumen, fiberoptic bronchoscopy and (CO) [Benumof], 117  
double-lumen, fiberoptic bronchoscopy and (CO) [Matthew & Hirschmann], 118  
in traumatic pseudoaneurysm of pulmonary artery (CR) [DiNardo], 334  
**endotracheal**  
fire ignited by pharyngeal electrocautery (CR) [Simpson & Wolf], 76  
flammability of, during Nd-YAG laser application in airway (LR) [Geffin, Shapshay, Bellack, Hobin & Setzer], 511  
migration of, early warning sign of (CO) [Gandhi, Munshi & Kampine], 114  
migration of, early warning sign of (CO) [Riley, Finucane & Marcy], 115  
security of, by clove hitch knot (CO) [Gonzales], 347
- underwater seal assembly**  
CPAP oxygenation during one-lung ventilation using (CO) [Baraka, Sibai, Muallem, Baroody, Haroun & Mekkaovi], 102
- ventilators**  
in anesthetic management of acutely ill patients during magnetic resonance imaging (CO) [Smith, Askey, Young & Kressel], 567  
malfunctioning, excessive airway pressure due to (CR) [Roth, Tweedie & Sommer], 532
- Esmolol, See under Heart; Sympathetic nervous system, sympathetic agents**
- Esophageal monitoring, See under Monitoring**
- Esophageal stethoscope, See under Equipment**
- Ester hydrolysis, See under Metabolism**
- Ethacrynic acid, See under Pharmacology**
- Etidocaine, See under Anesthetics, local**
- Etomidate, See under Anesthetics, intravenous**
- Evoked potentials, See under Brain; Spinal cord**
- Exhaust systems, See under Equipment**
- Experimental pain, See under Pain**
- Explosions, See under Complications**
- Extravascular lung water, See under Lung(s); Measurement techniques**
- Eye(s)**  
**intraocular pressure**  
effect of different methods of inducing anesthesia on (CR) [Badrinath, Vazeery, McCarthy & Ivankovich], 431
- F**
- Fabella syndrome, See under Complications**
- Facial paralysis, See under Nerve(s), damage**
- Fasciculation, See under Muscle**
- Fat embolism, See under Embolism**
- Fentanyl, See under Analgesics; Anesthetics, intravenous**
- Fetal heart rate, See under Monitoring**
- Fetal toxicity, See under Toxicity**
- Fiberoptic bronchoscope, See under Equipment**
- Fiberoptic bronchoscopy, See under Anesthetic techniques**
- Fiberoptic intubation, See under Intubation**
- Filston, H. C., and Izant, R. J., Jr.,**  
*The Surgical Neonate: Evaluation and Care* (BR), 135
- Filtration, renal, See under Kidney**
- Fire, See under Complications**
- Fluid balance**  
and perioperative blood glucose concentrations in pediatric outpatients (CR) [Welborn, McGill, Hannallah, Nisselson, Ruttimann & Hicks], 543
- Fluid warmers, See under Equipment**
- Flunitrazepam, See under Hypnotics**
- Fluoride**  
**toxicity induced by, See under Nephrotoxicity**
- Fructose-1,6-diphosphate, See under Metabolism**
- Functional residual capacity, See under Lung(s); Ventilation**
- G**
- Gases**  
**analysis**  
long mass-spectrometer sampling catheters for assessing concentration of, frequency response of (LR) [Scamman & Fishbaugh], 422  
**anesthetic, See under Anesthetics**  
**nitrogen**  
**end-tidal**  
sources of, in anesthesia circuit (CO) [Matjasko, Gunselman, Delaney & Mackenzie], 229
- Gastrointestinal tract**  
**gastric pH**  
dose-response effects of intravenous ranitidine on, in outpatients (OA) [Manchikanti, Colliver, Grow, Demeyer, Hadley & Roush], 180  
**histamine antagonists**  
in study of prophylactic intravenous cimetidine to reduce risk of acid aspiration in morbidly obese patients (CR) [Lam, Grace, Penny & Vezina], 684  
**motility**  
postoperative, effects of nitrous oxide on (CR) [Giuffre & Gross], 699
- stomach**  
dose-response effects of intravenous ranitidine on, in outpatients (OA) [Manchikanti, Colliver, Grow, Demeyer, Hadley & Roush], 180  
in study of prophylactic intravenous cimetidine to reduce risk of acid aspiration in morbidly obese patients (CR) [Lam, Grace, Penny & Vezina], 684

**volume**

- dose-response effects of intravenous ranitidine on, in outpatients (OA) [Manchikanti, Colliver, Grow, Demeyer, Hadley & Roush], 180
- in study of prophylactic intravenous cimetidine to reduce risk of acid aspiration in morbidly obese patients (CR) [Lam, Grace, Penny & Vezina], 684

**General anesthesia, *See under Anesthesia*****Genetic factors****Dutch-Kentucky syndrome**

- anesthetic management in (CR) [Browder, Lew & Shahbazian], 218

**Glucose, *See under Blood; Metabolism*****Glucose utilization cerebral, *See under Brain*****Gynecologic surgery, *See under Surgery*****H****Halothane, *See under Anesthetics, volatile*****Headaches, *See under Complications*****Heart****arrhythmias**

- delays onset of action of intravenous atropine in infants (CR) [Zimmerman & Steward], 320
- and electrophysiologic effects of halothane and quinidine on canine Purkinje fibers (OA) [Gallagher, Gessman, Moura & Kerns], 278
- in epinephrine administration, enhanced by aminophylline during halothane in dogs (OA) [Prokocimer, Nicholis, Gaba & Maze], 13
- and optimum site and strength-duration relationship of transesophageal indirect atrial pacing (CR) [Chung, Townsend & Kerr], 428
- relationship of amide local anesthetic alterations of effective refractory period temporal dispersion to (OA) [Kasten], 61

**blood flow**

- effects of interactions of nicardipine and isoflurane on (OA) [Hysing, Chelly, Doursout, Hartley & Merin], 385

**bradycardia**

- delays onset of action of intravenous atropine in infants (CR) [Zimmerman & Steward], 320
- and optimum site and strength-duration relationship of transesophageal indirect atrial pacing (CR) [Chung, Townsend & Kerr], 428

**cardiac output**

- amide local anesthetic alterations of (OA) [Kasten], 61
- effect of, on extravascular lung water measurements made with thermoconductivity method (LR) [Noble & Kay], 206
- during high-frequency ventilation at low and high airway pressure in dogs (OA) [Gioia, Harris, Traystman & Rogers], 50

**cardiopulmonary resuscitation**

- utility of pulse oximeter during (CO) [Narang], 239

**cardiotoxicity**

- bupivacaine-induced, is related to increased brain sensitivity (CO) [Morishima, Pedersen, Finster, Arthur & Covino], 346
- bupivacaine-induced, is related to increased brain sensitivity (CO) [Norris], 346

**conduction**

- amide local anesthetic alterations of (OA) [Kasten], 61
- and electrophysiologic effects of halothane and quinidine on canine Purkinje fibers (OA) [Gallagher, Gessman, Moura & Kerns], 278

**congenital defects**

- and developmental outcome in children undergoing surgery with profound hypothermia (CR) [Blackwood, Haka-Ikse & Steward], 437

**Down's syndrome**

- increased perioperative risk following repair of (CR) [Murray, Gillivray & Duker], 221

**congenital heart disease**

- comparative effects of halothane and ketamine on systemic arterial oxygen saturation in children with (CR) [Greeley, Bushman, Davis & Reves], 666

**cyanotic heart disease**

- comparative effects of halothane and ketamine on systemic arterial oxygen saturation in children with (CR) [Greeley, Bushman, Davis & Reves], 666

**dysrhythmias**

- analysis and therapy in pediatric cardiac surgical patients, intraoperative esophageal electrocardiography for (CR) [Greeley, Kates, Armstrong & Grant], 669
- and antiarrhythmic drugs, do not discontinue preoperatively (CO) [Landow], 238
- during endotracheal intubation in patients undergoing carotid endarterectomy, evaluation of esmolol in controlling (CR) [Cucchiara, Benefiel, Matteo, DeWood & Albin], 528

**echocardiography**

- and validation of quantitative intraoperative transesophageal echocardiography (LR) [Konstadt, Thys, Mindich, Kaplan & Goldman], 418

**electrocardiography**

- intraoperative, for dysrhythmia analysis and therapy in pediatric cardiac surgical patients (CR) [Greeley, Kates, Armstrong & Grant], 669
- recorded from multiorificed catheter, position of proximal orifice determines (CO) [Warner & Cucchiara], 235

**esmolol**

- safety and efficacy of, during myocardial revascularization (OA) [Girard, Shulman, Thys, Mindich, Mikula & Kaplan], 157

**hemodynamics**

- in study of safety and efficacy of esmolol during myocardial revascularization (OA) [Girard, Shulman, Thys, Mindich, Mikula & Kaplan], 157

**idiopathic hypertrophic subaortic stenosis**

- anesthetic management of cesarean section in patient with (CR) [Boccio, Chung & Harrison], 663

**nifedipine**

- sublingual, easy way to administer (CO) [Schiller], 239

**pacemaker****transesophageal**

- optimum site and strength-duration relationship of (CR) [Chung, Townsend & Kerr], 428

**polymorphous ventricular tachycardia**

- and antiarrhythmic drugs, do not discontinue preoperatively (CO) [Landow], 238

**Purkinje fibers**

- electrophysiologic effects of halothane and quinidine on, in dogs (OA) [Gallagher, Gessman, Moura & Kerns], 278

**quinidine**

- electrophysiologic effects of, on canine Purkinje fibers (OA) [Gallagher, Gessman, Moura & Kerns], 278

**tachycardia**

- during endotracheal intubation in patients undergoing carotid endarterectomy, evaluation of esmolol in controlling (CR) [Cucchiara, Benefiel, Matteo, DeWood & Albin], 528

**T-wave abnormalities**

- perioperative, clinical significance of (CO) [Breslow, Miller, Parker, Walman & Rogers], 561
- perioperative, clinical significance of (CO) [Jain], 561

**ventricular function**

- effects of interactions of nicardipine and isoflurane on (OA) [Hysing, Chelly, Doursout, Hartley & Merin], 385

**ventricular performance**  
and validation of quantitative intraoperative transesophageal echocardiography (LR) [Konstadt, Thys, Mindich, Kaplan & Goldman], 418

**Heart disease, See under Heart**

**Heart rate, See under Circulation**

**Hematocrit, See under Blood**

**Hemodynamics, See under Heart**

**Hemorrhage**  
preservation of cerebral metabolites by etomidate during, in dogs (OA) [Milde & Milde], 272

**Hepatotoxicity, See under Complications**

**High frequency ventilation, See under Ventilation**

**High-pressure liquid chromatography, See under Measurement techniques**

**Histamine**  
**antagonists, See also under Gastrointestinal tract**  
intravenous, dose-response effects of, on gastric pH and volume in outpatients (OA) [Manchikanti, Colliver, Grow, Demeyer, Hadley & Roush], 180

**History**  
**of anesthesia**  
Anesthesia on the Western Front: The Anglo-American Experience of World War I (SA) [Courington & Calverley], 642

**Hoffer, E. P., and Barnett, G. O.**  
*Arterial Blood Gases* (computer software package) (BR), 454

**Hogmann elimination, See under Metabolism**

**Hormones**  
**dexamethasone**  
does not alter nondepolarizing muscle relaxant effects in humans (CR) [Schwartz, Matteo, Ornstein & Silverberg], 326

**hydrocortisone**  
does not alter nondepolarizing muscle relaxant effects in humans (CR) [Schwartz, Matteo, Ornstein & Silverberg], 326

**parathyroid**  
and abnormal responses to muscle relaxants in patient with primary hyperparathyroidism (CR) [Al-Mohaya, Naguib, Abdelatif & Farag], 554

**Hoses, See under Equipment**

**Hydrocortisone, See under Hormones**

**Hydromorphone, See under Analgesics, narcotic**

**Hypnotics**  
**diazepam**  
hemodynamic effects of, in patients with ischemic heart disease: assessment with radionuclide approach (CR) [Lepage, Blauloeil, Pinaud, Helias, Auneau, Cozian & Souron], 678

**Hyperalgesia, See under Complications**

**Hyperkplexia, See under Muscle, skeletal**

**Hyperkalemia, See under Ions, potassium**

**Hypertension, See under Blood pressure; Complications**

**Hyperthermia**  
**malignant**  
clinically significant muscle weakness induced by oral dantrolene sodium prophylaxis for (CR) [Watson, Reiersen & Norfleet], 312  
normal humans and humans susceptible to, comparison of metabolites in skeletal muscle biopsies from (LR) [Verburg, Britt, Oerlemans, Scott, van Egmond & Bruijn], 654  
platelets and (CO) [Edwards & Adragna], 100  
platelets and (CO) [Solomons], 100  
removal of volatile anesthetic agents from breathing circuit in (CO) [Greene], 240

**Hypnotics**  
**flunitrazepam**  
hemodynamic effects of, in patients with ischemic heart disease: assessment with radionuclide approach (CR) [Lepage, Blauloeil, Pinaud, Helias, Auneau, Cozian & Souron], 678

**midazolam**  
hemodynamic effects of, in patients with ischemic heart disease: assessment with radionuclide approach (CR) [Lepage, Blauloeil, Pinaud, Helias, Auneau, Cozian & Souron], 678  
is it desirable for sedation in parturients? (CO) [Camann, Cohen & Ostheimer], 441

**Hypocalcemia, See under Complications**

**Hypotension, See under Anesthetic techniques; Blood pressure; Complications**

**Hypothermia**  
profound, developmental outcome in children undergoing surgery with (CR) [Blackwood, Haka-Ikse & Steward], 437

**Hypoventilation, See under Ventilation**

**Hypoxemia, See also under Complications**  
**acute**  
effects of fructose-1,6-diphosphate, glucose, and saline on cardiac resuscitation in (OA) [Farias, Willis & Gregory], 595  
**survival time**  
effects of fructose-1,6-diphosphate, glucose, and saline on cardiac resuscitation in (OA) [Farias, Willis & Gregory], 595

**Hypoxia, See under Complications**

**Hypoxic gas mixtures, See under Complications**

I

**Idiopathic hypertrophic subaortic stenosis, See under Heart**

**Infrared thermography, See under Measurement techniques**

**Interactions**  
**drug**  
halothane and quinidine, electrophysiologic effects of, on canine Purkinje fibers (OA) [Gallagher, Gessman, Moura & Kerns], 278

**Intercostal nerve, See under Anesthetic techniques**

**Intracranial pressure, See under Brain**

**Intraocular pressure, See under Eye(s)**

**Intraspinal morphine, See under Anesthetics, intraspinal**

**Intrathecal injection, See under Anesthetic techniques**

**Intravascular injection, See under Complications**

**Intravenous infusion, See under Anesthetic techniques**

**Intubation**  
**endotracheal**  
**head position**  
sniffing (CO) [Feldman], 343  
rapid-sequence: vecuronium *versus* pancuronium *versus* succinylcholine? (CO) [Kirkpatrick], 443  
rapid-sequence: vecuronium *versus* pancuronium *versus* succinylcholine? (CO) [Lennon, Gronert & Olson], 444  
technique, modification of, for laryngoscopy (CO) [King, Wang & Khan], 566  
technique (CO) [Bourke], 230  
technique (CO) [Rooney], 230  
**training**  
and sniffing position for (CO) [Feldman], 343

**fiberoptic**  
in anesthetic management of patient with Dutch-Kentucky syndrome (CR) [Browder, Lew & Shahbazian], 218  
securing of tube for (CO) [Gonzales], 347

**Ions**  
**calcium**  
**cardiovascular performance**  
measurement of, during hepatic transplantation in humans (OA) [Marquez, Martin, Virji, Kang, Warty, Shaw, Sassano, Waterman, Winter & Pinsky], 457  
measurement of, during hepatic transplantation in humans (OA) [Marquez, Martin, Virji, Kang, Warty, Shaw, Sassano, Waterman, Winter & Pinsky], 457

**calcium channel blockers****nicardipine**

hemodynamic interactions of, with isoflurane (OA) [Hysing, Chelly, Doursout, Hartley & Merin], 385

and effects of inhalational anesthetics on verapamil pharmacokinetics in dogs (OA) [Chelly, Hysing, Abernethy, Doursout & Merin], 266

**potassium**

epidural injection of, neurologic changes following (CR) [Lin, Becker & Shapiro], 210

**hyperkalemia**

treatment with epinephrine (CO) [Vitez], 350  
and hypokalemia in trauma patients (CR) [Shin, Mackenzie & Helrich], 90

**Isoflurane, See under Anesthetics, volatile; Metabolism**

**Isoproterenol, See under Sympathetic nervous system**

**Isovolemic hemodilution, See under Blood**

**J**

**Jokl, E.**

*Sudden Death in Athletes* (BR), 454

**Jugular vein, See under Veins**

**K**

**Ketamine, See under Anesthetics, intravenous**

**Kidney****blood flow**

effects of interactions of nicardipine and isoflurane on (OA) [Hysing, Chelly, Doursout, Hartley & Merin], 385

effects of renal sympathetic blockade on, in patients undergoing major aortic abdominal surgery (CR) [Gamulin, Forster, Simonet, Aymon & Favre], 688

during high-frequency ventilation at low and high airway pressure in dogs (OA) [Gioia, Harris, Traystman & Rogers], 50

**failure****decreased central volume**

after intravenous cimetidine in intensive care unit patients (CO) [Guay & Matzke], 130

after intravenous cimetidine in intensive care unit patients (CO) [Iberti], 131

**filtration**

effects of renal sympathetic blockade on, in patients undergoing major aortic abdominal surgery (CR) [Gamulin, Forster, Simonet, Aymon & Favre], 688

**lithotripsy**

support of arms during (CO) [Jones, Zornow & Sarnat], 341

**oxygen consumption, See under Oxygen**

**L**

**Laryngoscope, See under Equipment**

**Laryngoscopy, See under Anesthetic techniques**

**Laser, See under Equipment**

**Laudanosine, See under Central nervous system; Cerebrospinal fluid; Metabolism; Pharmacokinetics**

**Lidocaine, See under Anesthetics, local; Drug interactions**

**Lithotripsy**

extracorporeal shock-wave, placement of ECG electrodes during (CO) [Sarnat & Zornow], 133

**Lithotripsy, See under Kidney; Surgery**

**Liver****blood flow**

during high-frequency ventilation at low and high airway pressure in dogs (OA) [Gioia, Harris, Traystman & Rogers], 50

**cells**

in rats exposed to halothane and hypoxia *in vitro* (OA) [Becker, Hensel, Holland, Miletich & Albrecht], 379

**citrate**

measurement of, during hepatic transplantation in humans (OA) [Marquez, Martin, Virji, Kang, Warty, Shaw, Sassano, Waterman, Winter & Pinsky], 457

**metabolism**

measurement of, during hepatic transplantation in humans (OA) [Marquez, Martin, Virji, Kang, Warty, Shaw, Sassano, Waterman, Winter & Pinsky], 457

in rats exposed to halothane and hypoxia *in vitro* (OA) [Becker, Hensel, Holland, Miletich & Albrecht], 379

**transplantation**

cardiovascular depression secondary to ionic hypocalcemia during (OA) [Marquez, Martin, Virji, Kang, Warty, Shaw, Sassano, Waterman, Winter & Pinsky], 457

**Local anesthetics, See under Anesthetics**

**Lumbar anesthesia, See under Anesthetic techniques**

**Lung(s)****aspiration**

and dose-response effects of intravenous ranitidine on gastric pH and volume in outpatients (OA) [Manchikanti, Colliver, Grow, Demeyer, Hadley & Roush], 180

**asthma**

and action of halothane on histamine-induced airway constriction in dogs (OA) [Shah & Hirshman], 170

**bronchus**

tracheo-bronchial angles in infants and children (CO) [Bloch], 236

**compliance**

changes in, during cardiac surgery in children 11 days to 4 years of age (OA) [Jonmarker, Larsson & Werner], 259

histamine-induced in dogs with reactive airways, mode of action of halothane on (OA) [Shah & Hirshman], 170

edema following acute upper airway obstruction (CO) [Frank & Schreiber], 106

**extravascular lung water**

effect of cardiac output on, measured by thermoconductivity method (LR) [Noble & Kay], 206

**functional residual capacity**

changes in, during cardiac surgery in children 11 days to 4 years of age (OA) [Jonmarker, Larsson & Werner], 259

**pulmonary artery**

effects of nitrous oxide on, in infants with normal and elevated pulmonary vascular resistance (OA) [Hickey, Hansen, Strafford, Thompson, Jonas & Mayer], 374

**respiratory depression**

and kinetics of intrathecally injected D-Ala<sup>2</sup>-D-Leu<sup>5</sup>-enkephalin and morphine in unanesthetized dogs (OA) [Atchison, Durant & Yaksh], 609

**respiratory resistance**

histamine-induced in dogs with reactive airways, mode of action of halothane on (OA) [Shah & Hirshman], 170

**trachea**

tracheo-bronchial angles in infants and children (CO) [Bloch], 236

**vascular resistance**

effects of nitrous oxide on, in infants with normal and elevated pulmonary vascular resistance (OA) [Hickey, Hansen, Strafford, Thompson, Jonas & Mayer], 374

**M**

**MAC, See under Potency, anesthetic**

**Magnetic resonance imaging, See under Anesthetic techniques; Monitoring**



**Malignant hyperthermia, See under Hyperthermia**

**Manpower**

**anesthetists**

in administration of obstetric anesthesia (EV) [Levinson & Shneider], 245

obstetric anesthesia: a national survey (SA) [Gibbs, Krischer, Peckham, Sharp & Kirschbaum], 298

**obstetricians**

in administration of obstetric anesthesia (EV) [Levinson & Shneider], 245

**residents**

attributes wanted in (CO) [Springman, Berry, Cascorbi, Kaplan & Schneider], 107

**Mass spectrometer, See under Equipment**

**Mass spectrometry, See also under Measurement techniques; Monitoring**

**respiratory**

long sampling catheters for, frequency response of (LR) [Scamman & Fishbaugh], 422

**Maximum venous pressure, See under Measurement techniques**

**Measurement**

**airway pressure**

low and high, organ blood flow during high-frequency ventilation at (OA) [Gioia, Harris, Traystman & Rogers], 50

**Measurement techniques**

**arterial pressure**

in assessment of effects of nitrous oxide in infants with normal and elevated pulmonary vascular resistance (OA) [Hickey, Hansen, Strafford, Thompson, Jonas & Mayer], 374

**cardiac output**

in assessment of effects of nitrous oxide in infants with normal and elevated pulmonary vascular resistance (OA) [Hickey, Hansen, Strafford, Thompson, Jonas & Mayer], 374

effect of, on extravascular lung water measurements made with thermoconductivity method (LR) [Noble & Kay], 206

**chromatography**

**capillary gas**

to assay sufentanil plasma levels (CO) [Avram, Henthorn & Krejcie], 110

to assay sufentanil plasma levels (CO) [Gandolfi, Cork & Levy], 112

to assay sufentanil plasma levels (CO) [Heykants, Woestenborghs & Timmerman], 112

**high-performance liquid**

in study of platelets and malignant hyperthermia (CO) [Edwards & Adragna], 100

in study of platelets and malignant hyperthermia (CO) [Solomons], 100

**Doppler flow probe**

and effect of intravenous epinephrine on uterine artery blood flow velocity in pregnant guinea pig (OA) [Chestnut, Weiner, Martin, Herrig & Wang], 633

**enzymatic**

to assay serum cholinesterase with succinylcholine (CO) [George, Abernethy & Herron], 104

to assay serum cholinesterase with succinylcholine (CO) [Wakid, Tubbeh & Baraka], 105

**extravascular lung water**

effect of cardiac output on, measured by thermoconductivity method (LR) [Noble & Kay], 206

**high-pressure liquid chromatography**

in study of uptake and distribution of bupivacaine in fetal lambs (OA) [Kennedy, Miller, Bell, Doshi, deSousa, Kennedy, Heald & David], 247

**infrared thermography**

in study of skin temperature changes and their relationship to

sympathetic blockade during spinal anesthesia (EV) [Greene], 137

in study of skin temperature changes and their relationship to sympathetic blockade during spinal anesthesia (OA) [Chamberlain & Chamberlain], 139

**mass spectrometry**

simpler design for, in awake patient (CO) [Huntington & King], 565

**maximum venous pressure**

in evaluation and prevention of leakage under tourniquet (CR) [Grice, Morell, Balestrieri, Stump & Howard], 316

**neuromuscular blockade**

simple technique for remote monitoring of (CO) [Smith & Greenwalt], 562

**noninvasive**

of breathing pattern and thoraco-abdominal motion following ketamine and droperidol (OA) [Morel, Forster & Gemperle], 392

**oximetry**

in study of effect of anesthetic induction regimens on oxygen saturation in cyanotic congenital heart disease (CR) [Laishley, Burrows, Lerman & Roy], 673

utility of, during cardiopulmonary resuscitation (CO) [Narang], 239

**oxygen analyzers**

fail-safe (CO) [Baumgarten], 129

**oxygen saturation**

in study of effect of pregnancy on oxyhemoglobin dissociation curve (LR) [Kambam, Handte, Brown & Smith], 426

**pulse oximetry**

finger probe, cost-saving method of modifying (CO) [Tharp], 446

**radionuclide contrast angiography**

in assessment of hemodynamics effects of diazepam, flunitrazepam, and midazolam in patients with ischemic heart disease (CR) [Lepage, Blanloeil, Pinaud, Helias, Auneau, Cozian & Souron], 678

**somatosensory evoked potentials**

upper extremity, in humans, effects of thiopental, fentanyl, and etomidate on (OA) [McPherson, Sell & Traystman], 584

**transesophageal echocardiography**

quantitative intraoperative, validation of (LR) [Konstadt, Thys, Mindich, Kaplan & Goldman], 418

**Mechanical ventilation, See under Ventilation**

**Medicolegal**

**brain death**

organ donors, blood gas values change slowly in (CO) [Bruce], 128

**Mepivacaine, See under Anesthetics, local**

**Metabolism, See also under individual organs**

**adenosine diphosphate**

in rats exposed to halothane and hypoxia *in vitro* (OA) [Becker, Hensel, Holland, Miletich & Albrecht], 379

**adenosine triphosphate**

in rats exposed to halothane and hypoxia *in vitro* (OA) [Becker, Hensel, Holland, Miletich & Albrecht], 379

**atracurium**

metabolite, in dogs (OA) [Hennis, Fahey, Canfell, Shi & Miller], 56

**carbon dioxide production**

and measured *versus* predicted metabolic rate (CO) [Long], 707  
and measured *versus* predicted metabolic rate (CO) [Weissman], 708

**central nervous system**

effects of isoflurane on, in rat (OA) [Ori, Dam, Pizzolato, Battistin & Giron], 152

- drug**  
extent of, of inhaled anesthetics in humans (OA) [Carpenter, Eger, Johnson, Unadkat & Sheiner], 201
- enflurane**  
renal function in obese and nonobese Fischer 344 rats following exposure to (OA) [Rice & Fish], 28
- enzyme induction**  
in rats exposed to halothane and hypoxia *in vitro* (OA) [Becker, Hensel, Holland, Miletich & Albrecht], 379
- ester hydrolysis**  
elimination of atracurium by, in humans (OA) [Fisher, Canfell, Fahey, Rosen, Rupp, Sheiner & Miller], 6
- fasting**  
in rats exposed to halothane and hypoxia *in vitro* (OA) [Becker, Hensel, Holland, Miletich & Albrecht], 379
- fructose-1,6-diphosphate**  
effects of, on cardiac resuscitation (OA) [Farias, Willis & Gregory], 595
- glucose**  
effects of, on cardiac resuscitation (OA) [Farias, Willis & Gregory], 595
- Hofmann elimination**  
elimination of atracurium by, in humans (OA) [Fisher, Canfell, Fahey, Rosen, Rupp, Sheiner & Miller], 6
- hypoxia**  
and halothane effects on liver cells (OA) [Becker, Hensel, Holland, Miletich & Albrecht], 379
- isoflurane**  
renal function in obese and nonobese Fischer 344 rats following exposure to (OA) [Rice & Fish], 28
- laudanosine**  
pharmacology of, in dogs (OA) [Hennis, Fahey, Canfell, Shi & Miller], 56
- metabolites**  
enflurane and isoflurane, and renal function in obese and non-obese Fischer 344 following anesthesia with (OA) [Rice & Fish], 28
- oxygen consumption**  
and measured *versus* predicted metabolic rate (CO) [Long], 707  
and measured *versus* predicted metabolic rate (CO) [Weissman], 708
- respiratory quotient**  
and measured *versus* predicted metabolic rate (CO) [Long], 707  
and measured *versus* predicted metabolic rate (CO) [Weissman], 708
- Metabolites, See under Metabolism**  
**skeletal muscle, See under Muscle**
- Methoxyflurane, See under Anesthetics, volatile**
- Metocurine, See under Neuromuscular relaxants**
- Microcirculation**  
**arterioles**  
rat muscle, dose-dependent effects of bupivacaine on (OA) [Johns, Seyde, DiFazio & Longnecker], 186
- Midazolam, See under Anesthetics, intravenous; Hypnotics; Pharmacokinetics; Premedication**
- Military anesthesia, See under Anesthesia**
- Monitored anesthetic care, See under Monitoring**
- Monitoring**  
**carbon dioxide tension**  
during bronchoscopy in infant with airway obstruction (CO) [Weinberg & Werbin], 703
- central venous pressure**  
position of proximal orifice determines electrocardiogram recorded from multiorificed catheter (CO) [Warner & Cucchiara], 235
- echocardiography**  
and validation of quantitative intraoperative transesophageal echocardiography (LR) [Konstadt, Thys, Mindich, Kaplan & Goldman], 418
- electrocardiography**  
**esophageal**  
intraoperative, for dysrhythmia analysis and therapy in pediatric cardiac surgical patients (CR) [Greeley, Kates, Armstrong & Grant], 669  
placement of electrodes in, during extracorporeal shock-wave lithotripsy (CO) [Sarnat & Zornow], 133  
recorded from multiorificed catheter, position of proximal orifice determines (CO) [Warner & Cucchiara], 235
- electromyography**  
in assessment of potency of pancuronium at diaphragm and adductor pollicis muscle in humans (OA) [Donati, Antzaka & Bevan], 1
- equipment**  
**computers**  
for anesthesia records (CO) [Noel], 133  
for anesthesia records (CO) [Rosen & Rosenzweig], 131  
for anesthesia records (CO) [Sarnat], 132
- monitors**  
for anesthesia records (CO) [Noel], 133  
for anesthesia records (CO) [Rosen & Rosenzweig], 131  
for anesthesia records (CO) [Sarnat], 132
- fetal heart rate**  
and simultaneous recording of maternal heart rate (CO) [Abou-leish & Johnson], 558  
and simultaneous recording of maternal heart rate (CO) [Chestnut and Weiner], 558
- magnetic resonance imaging**  
anesthetic management of acutely ill patients during (CO) [Smith, Askey, Young & Kressel], 567
- mass spectrometry**  
simpler design for, in awake patient (CO) [Huntington & King], 565
- monitored anesthetic care**  
simpler design for, in awake patient (CO) [Huntington & King], 565
- neuromuscular**  
in neuromuscular blockade variability (CO) [Sosis], 133
- neuromuscular blockade**  
by pancuronium, atracurium, and vecuronium, recovery times following edrophonium and neostigmine reversal of (OA) [Kopman], 572
- oxygen**  
methylene blue injection causing spurious pulse oximeter reading during (CR) [Kessler, Eide, Humayun & Poppers], 435  
utility of, during cardiopulmonary resuscitation (CO) [Narang], 239
- phrenic nerve stimulation**  
in assessment of potency of pancuronium at diaphragm and adductor pollicis muscle in humans (OA) [Donati, Antzaka & Bevan], 1
- pulse oximetry**  
and dilution of anesthetic gases by new light source for bronchoscopy (CO) [Berci & MacDonald], 446  
and dilution of anesthetic gases by new light source for bronchoscopy (CO) [Mostello & Patel], 445  
hypoxia caused by (CR) [Pickard & Reid], 534  
new use for (CO) [Introna & Silverstein], 342  
during shoulder arthroscopy (CO) [Herschman, Frost & Goldiner], 565  
in study of comparative effects of halothane and ketamine in chil-

dren with cyanotic heart disease (CR) [Greeley, Bushman, Davis & Reves], 666

**somatosensory evoked potentials**  
effects of halothane, enflurane, isoflurane, and nitrous oxide on, in humans (OA) [Peterson, Drummond & Todd], 35  
upper extremity, in humans, effects of thiopental, fentanyl, and etomidate on (OA) [McPherson, Sell & Traystman], 584

**stimulator nerve**  
comparing orbicularis oculi and adductor pollicis muscles (CR) [Caffrey, Warren & Becker], 95

**systemic arterial oxygen saturation**  
in study of comparative effects of halothane and ketamine in children with cyanotic heart disease (CR) [Greeley, Bushman, Davis & Reves], 666

**train-of-four**  
in assessment of potency of pancuronium at diaphragm and adductor pollicis muscle in humans (OA) [Donati, Antzaka & Bevan], 1  
in neuromuscular blockade variability (CO) [Sosis], 133  
relationship of, to twitch depression during pancuronium-induced neuromuscular blockade (OA) [Graham, Morris, Pybus, Torda & Woodey], 579

**visual evoked potentials**  
effects of isoflurane on, in humans (CR) [Chi & Field], 328

**Monitors, See under Equipment; Monitoring, equipment**

**Morphine, See under Analgesics, narcotic; Anesthetics, intravenous; Pharmacokinetics; Anesthetics, intraspinal**

**Motility**  
colonic, *See under Colon*

**Motor nerve terminal, See under Neuromuscular junction**

**Muscle**  
**skeletal**  
**diaphragm**  
contractility of, does halothane really reduce? (CO) [Clergue & Aubier], 702  
contractility of, does halothane really reduce? (CO) [Drummond], 701  
**fasciculation**  
and increases in intracranial pressure from succinylcholine (OA) [Minton, Grosslight, Stirt & Bedford], 165  
**hyperekplexia**  
neuromuscular blockade in patient with (CR) [Cook & Kaplan], 525  
**metabolites**  
from normal humans and those susceptible to malignant hyperthermia, compared (LR) [Verburg, Britt, Oerlemans, Scott, van Egmond & Bruijn], 654

**Muscle relaxants**  
**atracurium**  
abnormal responses to, in patient with primary hyperparathyroidism (CR) [Al-Mohaya, Naguib, Abdelatif & Farag], 554  
**succinylcholine**  
abnormal responses to, in patient with primary hyperparathyroidism (CR) [Al-Mohaya, Naguib, Abdelatif & Farag], 554

**Muscle weakness, See under Complications**

**Myasthenia gravis, See under Complications**

**Myocardial ischemia, See under Complications**

N

**Nalbuphine, See under Analgesics narcotic; Anesthetics, intravenous; Antagonists, narcotic**

**Naloxone, See under Antagonists, narcotic**

**Narcotics, See under Analgesics, narcotic**

**Nasal airway, See under Equipment**

**Nebulizer, See under Equipment**

**Neonate, See under Age factors**

**Neostigmine, See under Neuromuscular antagonists**

**Nephrotoxicity**  
**inorganic fluoride-induced**  
enflurane or isoflurane, in obese and nonobese Fischer 344 rats (OA) [Rice & Fish], 28

**Nerve damage, See under Complications**

**Nerve stimulator, See under Equipment**

**Nerve(s)**  
**C-fibers**  
narcotics do not alter heat response of, in monkey (OA) [Raja, Meyer, Campbell & Khan], 468

**damage**  
common peroneal nerve palsy associated with Fabella syndrome (CR) [Kubota, Toyoda, Kubota, Kawai & Yamamoto], 552

**postoperative**  
facial, after general anesthesia (CR) [Glauber], 516

**injury**  
due to local anesthetics, clinical relevance of experimental study of (CO) [Myers, Kalichman, Reisner & Powell], 341  
due to local anesthetics, clinical relevance of experimental study of (CO) [Selander], 340  
induced by local anesthetics (CO) [Cartwright], 119  
induced by local anesthetics (CO) [Myers, Kalichman, Reisner & Powell], 119

**nociceptors**  
narcotics do not alter heat response of, in monkey (OA) [Raja, Meyer, Campbell & Khan], 468

**primary afferents**  
narcotics do not alter heat response of, in monkey (OA) [Raja, Meyer, Campbell & Khan], 468

**unmyelinated afferents**  
narcotics do not alter heat response of, in monkey (OA) [Raja, Meyer, Campbell & Khan], 468

**Neuroleptoanesthesia, See under Anesthetic techniques**

**Neurologic surgery, See under Surgery**

**Neuromuscular antagonists**  
**edrophonium**  
antagonizes combined lidocaine-pancuronium and verapamil-pancuronium neuromuscular blockade in cats (OA) [Carpenter & Mulroy], 506  
reversal of pancuronium, atracurium, and vecuronium steady-state infusions, recovery times following (OA) [Kopman], 572

**neostigmine**  
reversal of pancuronium, atracurium, and vecuronium steady-state infusions, recovery times following (OA) [Kopman], 572

**Neuromuscular blockade, See under Measurement techniques; Monitoring**

**Neuromuscular blocking drugs**  
**pancuronium**  
in study of safety and efficacy of esmolol during myocardial revascularization (OA) [Girard, Shulman, Thys, Mindich, Mikula & Kaplan], 157

**Neuromuscular end plate, See under Neuromuscular junction**

**Neuromuscular junction**  
are studies of neuromuscular blocking drugs and their antagonists unnecessarily confusing? (EV) [Miller], 569  
does halothane really reduce diaphragmatic contractility (CO) [Clergue & Aubier], 702  
does halothane really reduce diaphragmatic contractility (CO) [Drummond], 701

**motor nerve terminal**  
and prejunctional effects of vecuronium in cat (OA) [Baker, Agüero, Stanec & Lowndes], 480

- and prevention of succinylcholine-evoked fasciculations by (OA) [Hartman, Fiamengo & Riker], 405
- neuromuscular end plate**
- and prejunctional effects of vecuronium in cat (OA) [Baker, Aguero, Stanec & Lowndes], 480
- postjunctional**
- and prejunctional effects of vecuronium in cat (OA) [Baker, Aguero, Stanec & Lowndes], 480
- posttetanic repetition and potentiation**
- and prejunctional effects of vecuronium in cat (OA) [Baker, Aguero, Stanec & Lowndes], 480
- prejunctional**
- and prejunctional effects of vecuronium in cat (OA) [Baker, Aguero, Stanec & Lowndes], 480
- prejunctional activity**
- and prevention of succinylcholine-evoked fasciculations by (OA) [Hartman, Fiamengo & Riker], 405
- synapse**
- and prejunctional effects of vecuronium in cat (OA) [Baker, Aguero, Stanec & Lowndes], 480
- Neuromuscular monitoring, See under Monitoring**
- Neuromuscular relaxants**
- atracurium**
- elimination of, in humans (OA) [Fisher, Canfell, Fahey, Rosen, Rupp, Sheiner & Miller], 6
- metabolite, pharmacology of, in dogs (OA) [Hennis, Fahey, Canfell, Shi & Miller], 56
- neuromuscular blockade monitoring in use of (CR) [Caffrey, Warren & Becker], 95
- patients with burns are resistant to (CR) [Dwersteg, Pavlin & Heimbach], 517
- pharmacokinetic explanation for increasing recovery time following larger or repeated doses of (OA) [Fisher & Rosen], 286
- for rapid-sequence induction (CO) [Kirkpatrick], 443
- for rapid-sequence induction (CO) [Lennon, Gronert & Olson], 444
- steady-state infusions of, recovery times following edrophonium and neostigmine reversal of (OA) [Kopman], 572
- dantrolene**
- oral, clinically significant muscle weakness induced by, for malignant hyperthermia (CR) [Watson, Reiersen & Norfleet], 312
- d-tubocurarine**
- acute steroid therapy does not alter effects of, in humans (CR) [Schwartz, Matteo, Ornstein & Silverberg], 326
- prevention of succinylcholine-evoked fasciculations by (OA) [Hartman, Fiamengo & Riker], 405
- metocurine**
- acute steroid therapy does not alter effects of, in humans (CR) [Schwartz, Matteo, Ornstein & Silverberg], 326
- pancuronium**
- acute steroid therapy does not alter effects of, in humans (CR) [Schwartz, Matteo, Ornstein & Silverberg], 326
- combined with lidocaine or verapamil for neuromuscular blockade in cats, edrophonium antagonizes (OA) [Carpenter & Mulroy], 506
- in patient with stiff-baby syndrome (CR) [Cook & Kaplan], 525
- pharmacokinetic explanation for increasing recovery time following larger or repeated doses of (OA) [Fisher & Rosen], 286
- potency of, at diaphragm and adductor pollicis in humans (OA) [Donati, Antzaka & Bevan], 1
- for rapid-sequence induction (CO) [Kirkpatrick], 443
- for rapid-sequence induction (CO) [Lennon, Gronert & Olson], 444
- relationship of train-of-four ratio to twitch depression during (OA) [Graham, Morris, Pybus, Torda & Woodey], 579
- steady-state infusions of, recovery times following edrophonium and neostigmine reversal of (OA) [Kopman], 572
- succinylcholine**
- assay of serum cholinesterase with (CO) [George, Abernethy & Herron], 104
- assay of serum cholinesterase with (CO) [Wakid, Tubbeh & Baraka], 105
- increases in intracranial pressure from (OA) [Minton, Grosslight, Stirt & Bedford], 165
- is different in humans than in dogs (CO) [Lanier, Milde & Michenfelder], 452
- is different in humans than in dogs (CO) [Merin], 452
- mechanism of fasciculations and their prevention by *d*-tubocurarine or diphenylhydantoin (OA) [Hartman, Fiamengo & Riker], 405
- for open eye surgery (CO) [Bourke], 110
- for open eye surgery (CO) [Weiner, Olk & Meyers], 109
- in patient with stiff-baby syndrome (CR) [Cook & Kaplan], 525
- in periparturient patients (CO) [Ramzan], 441
- for rapid-sequence induction (CO) [Kirkpatrick], 443
- for rapid-sequence induction (CO) [Lennon, Gronert & Olson], 444
- and their antagonists, are studies of, unnecessarily confusing? (EV) [Miller], 569
- vecuronium**
- acute steroid therapy does not alter effects of, in humans (CR) [Schwartz, Matteo, Ornstein & Silverberg], 326
- efficacy of priming principle with (CO) [Rupp, Taboada & Miller], 121
- efficacy of priming principle with (CO) [Sosis], 120
- pharmacokinetic explanation for increasing recovery time following larger or repeated doses of (OA) [Fisher & Rosen], 286
- prejunctional effects of, in cat (OA) [Baker, Aguero, Stanec & Lowndes], 480
- for rapid-sequence induction (CO) [Kirkpatrick], 443
- for rapid-sequence induction (CO) [Lennon, Gronert & Olson], 444
- reversal of, recurrence of neuromuscular blockade after, in patient receiving polymyxin/amikacin sternal irrigation (CR) [Kronenfeld, Thomas & Turndorf], 93
- steady-state infusions of, recovery times following edrophonium and neostigmine reversal of (OA) [Kopman], 572
- succinylcholine after, increases in intracranial pressure from (OA) [Minton, Grosslight, Stirt & Bedford], 165
- Neuromuscular transmission**
- are studies of neuromuscular blocking drugs and their antagonists unnecessarily confusing? (EV) [Miller], 569
- differential effects**
- potency of pancuronium at diaphragm and adductor pollicis muscle in humans (OA) [Donati, Antzaka & Bevan], 1
- Neuropathology, See under Brain**
- Neurosurgery**
- nitrous oxide withdrawal reduces intracranial pressure following (OA) [Skahen, Shapiro, Drummond, Todd & Zeiman], 192
- Nicardipine, See under Ions, calcium channel blockers**
- Nifedipine, See under Heart; Pharmacology**
- Nitrogen, See under Gases**
- Nitroglycerin, See under Anesthetic techniques, hypotension**
- Nitroprusside, See under Anesthetic techniques, hypotension**
- Nitrous oxide, See under Anesthetics, gases**
- Nociceptors, See under Nerve(s)**
- Nondepolarizing anesthetic agents, See under Anesthetics**
- Noninvasive measurements, See under Measurement techniques**

O

- Obesity, See under Complications**  
**Obstetric anesthesia, See under Anesthesia**  
**Obstetricians, See under Manpower**  
**Obstruction, See under Airway; Complications**  
**Occupational hazards, See under Anesthesiologists**  
**One-lung ventilation, See under Ventilation**  
**Ophthalmologic anesthesia, See under Anesthesia**  
**Opiate receptors, See under Receptors**  
**Opiates, See under Anesthetic techniques, epidural**  
**Organizations**  
  **American Society of Anesthesiologists**  
    award for excellence in research (EV) [Saidman], 359  
    award to John Severinghaus (SA) [Hornbein], 360  
    Committee on Acute Medicine (CO) [Poulton], 710  
**Orthopedics, See under Surgery**  
**Osmotic pump, See under Equipment**  
**Ostheimer, G. W. (ed.)**  
  *Manual of Obstetric Anesthesia* (BR), 568  
**Oximetry, See under Measurement techniques**  
**Oxygen**  
  **consumption**  
    **brain**  
      in apneic organ donors (CO) [Bruce], 128  
    **kidney**  
      in apneic organ donors (CO) [Bruce], 128  
      and measured *versus* predicted metabolic rate (CO) [Long], 707  
      and measured *versus* predicted metabolic rate (CO) [Weissman], 708  
  **monitoring, See under Monitoring**  
  **oxyhemoglobin dissociation**  
    effect of normal and preeclamptic pregnancies on (LR) [Kambam, Handte, Brown & Smith], 426  
  **P-50**  
    effect of normal and preeclamptic pregnancies on (LR) [Kambam, Handte, Brown & Smith], 426  
  **saturation**  
    and effects of intravenously administered dyes on pulse oximetry readings (GR) [Scheller, Unger & Kelner], 550  
  **tension**  
    **rate of decline**  
      in apneic organ donors (CO) [Bruce], 128  
  **transport**  
    effect of normal and preeclamptic pregnancies on (LR) [Kambam, Handte, Brown & Smith], 426  
  **uptake**  
    Brody's equation for calculation of (CO) [Frenette, Baillargeon & Perreault], 704  
**Oxygen analyzers, See under Measurement techniques; Equipment**  
**Oxygen consumption, cerebral, See under Brain**  
**Oxygen saturation, See also under Measurement techniques**  
  **systemic arterial, See under Monitoring**  
**Oxyhemoglobin dissociation, See under Oxygen**

P

- P-50, See under Oxygen**  
**Pacemaker, See under Heart**  
**Pain**  
  **experimental**  
    study of lack of reversal of nitrous oxide analgesia by low-dose naloxone (CO) [Gillman], 449  
  **postoperative**  
    and epidural morphine in children: pharmacokinetics and CO<sub>2</sub> sensitivity (OA) [Attia, Ecoffey, Sandouk, Gross & Samii], 590  
**Pain coding, See under Spinal cord**  
**Pancuronium, See under Drug interactions; Neuromuscular relaxants; Neuromuscular blocking drugs; Pharmacodynamics; Pharmacokinetics**  
**Paralysis, See under Complications; Nerve(s), damage**  
**Parasympathetic nervous system**  
  **atropine**  
    intravenous, bradycardia delays onset of action of, in infants (CR) [Zimmerman & Steward], 320  
    mode of action of, on histamine-induced airway constriction in dogs with reactive airways (OA) [Shah & Hirshman], 170  
**Parathyroid hormones, See under Hormones**  
**Partial pressure concentration, See under Solubility**  
**Partition coefficients, See under Solubility**  
**Pattern of breathing, See under Ventilation**  
**Pediatric anesthesia, See under Anesthesia**  
**Pentazocine, See under Analgesics**  
**Peptides, See under Analgesics**  
**Peridural anesthesia, See under Anesthetic techniques**  
**Peridural catheters, See under Equipment**  
**Peridural caudal anesthesia, See under Anesthetic techniques**  
**Periodic breathing, See under Complications**  
**pH, gastric, See under Gastrointestinal tract, See also under Acid-base equilibrium**  
**Phantom limb pain, See under Complications**  
**Pharmacodynamics**  
  **alfentanil**  
    dose-response curves and pharmacokinetics of (EV) [Waud & Waud], 355  
    plasma concentrations of, required to supplement nitrous oxide anesthesia for general surgery (OA) [Ausems, Hug, Stanski & Burm], 362  
    and drug therapy in burned patient (MI) [Martyn], 67  
  **pancuronium**  
    relationship of train-of-four ratio to twitch depression during (OA) [Graham, Morris, Pybus, Torda & Woodey], 579  
  **succinylcholine**  
    in peripartum patients (CO) [Ramzan], 441  
**Pharmacokinetics**  
  **alfentanil**  
    and dose-response curves of (EV) [Waud & Waud], 355  
    plasma concentrations of, required to supplement nitrous oxide anesthesia for general surgery (OA) [Ausems, Hug, Stanski & Burm], 362  
  **atracurium**  
    explanation for increasing recovery time following larger or repeated doses of (OA) [Fisher & Rosen], 286  
    in humans (OA) [Fisher, Canfell, Fahey, Rosen, Rupp, Sheiner & Miller], 6  
  **cimetidine**  
    intravenous, hypotension after, in intensive care unit patients (CO) [Guay & Matzke], 130  
    intravenous, hypotension after, in intensive care unit patients (CO) [Iberti], 131  
  **distribution**  
    of etomidate, and increased sensitivity to, in elderly (OA) [Arden, Holley & Stanski], 19  
    and drug therapy in burned patient (MI) [Martyn], 67  
  inhaled anesthetics in humans (OA) [Carpenter, Eger, Johnson, Unadkat & Sheiner], 201  
  **intravenous drugs**  
    following computer-assisted infusion of (CO) [Maitre, Vozeh & Stanski], 344  
  **kinetics**  
    of etomidate, and increased sensitivity to, in elderly (OA) [Arden, Holley & Stanski], 19

- laudanosine**  
in dogs (OA) [Hennis, Fahey, Canfell, Shi & Miller], 56
- midazolam**  
rectal, for premedication in children (CR) [Saint-Maurice, Meistelman, Rey, Esteve, deLauture & Olive], 536
- morphine**  
**epidural**  
in children (OA) [Attia, Ecoffey, Sandouk, Gross & Samii], 590
- pancuronium**  
explanation for increasing recovery time following larger or repeated doses of (OA) [Fisher & Rosen], 286  
relationship of train-of-four ratio to twitch depression during (OA) [Graham, Morris, Pybus, Torda & Woodey], 579  
and physiognomy (CO) [Parsloe], 704  
and physiognomy (CO) [Saidman], 705
- succinylcholine**  
in peripartum patients (CO) [Ramzan], 441
- sufentanil**  
plasma, reliability of assays of (CO) [Heykants, Woestenborghs & Timmerman], 112
- uptake**  
and acceleration of epinephrine absorption by lidocaine (CO) [Sosis & Temple], 103  
and acceleration of epinephrine absorption by lidocaine (CO) [Ueda], 104
- vecuronium**  
explanation for increasing recovery time following larger or repeated doses of (OA) [Fisher & Rosen], 286
- verapamil**  
effects of inhalational anesthetics on, in dogs (OA) [Chelly, Hysing, Abernethy, Doursout & Merin], 266
- Pharmacokinetics**  
**intravenous drugs**  
following computer-assisted infusion of (CO) [Alvis, Jacobs & Reves], 345
- Pharmacology**  
**aminophylline**  
during halothane anesthesia, epinephrine arrhythmogenicity enhanced by (OA) [Prokocimer, Nicholis, Gaba & Maze], 13  
treatment in rats and dogs, halothane requirements are not affected by (OA) [Nicholis, Louie, Prokocimer & Maze], 637
- calcium channel blocker**  
effects of inhalational anesthetics on, in dogs (OA) [Chelly, Hysing, Abernethy, Doursout & Merin], 266
- calcium channel blocking drugs**  
and administration of sublingual nifedipine (CO) [Schiller], 239
- cimetidine**  
intravenous, hypotension after, in intensive care unit patients (CO) [Guay & Matzke], 130  
intravenous, hypotension after, in intensive care unit patients (CO) [Iberti], 131  
prophylactic intravenous, reduces risk of acid aspiration in morbidly obese patients (CR) [Lam, Grace, Penny & Vezina], 684
- clonidine**  
ethacrynic acid interferes with (CO) [Hosking], 128  
ethacrynic acid interferes with (CO) [Johnston, Nicholas, Lawson, Wallfisch & Arens], 129  
**rectal administration**  
therapy for perioperative period (CO) [Bernstein], 451  
**transdermal**  
therapy for perioperative period (CO) [Bernstein], 451
- drug interactions**  
nicardipine and isoflurane, and cardiovascular effects of (OA) [Hysing, Chelly, Doursout, Hartley & Merin], 385  
and drug therapy in burned patient (MI) [Martyn], 67
- epinephrine**  
**racemic**  
nebulized, to facilitate removal of aspirated peanut fragments in pediatric patients (CR) [Bready, Orr, Petty, Grover & Harman], 523
- ethacrynic acid**  
interferes with vasodilators (CO) [Hosking], 128  
interferes with vasodilators (CO) [Johnston, Nicholas, Lawson, Wallfisch & Arens], 129
- local anesthetic**  
relationship to ventricular arrhythmias (OA) [Kasten], 61
- nifedipine**  
counteracts hypertension in gravid ewes (OA) [Norris, Rose & Dewan], 254
- premedication**  
intravenous ranitidine, dose-response effects of, on gastric pH and volume in outpatients (OA) [Manchikanti, Colliver, Grow, Demeyer, Hadley & Roush], 180
- ranitidine**  
intravenous, dose-response effects of, on gastric pH and volume in outpatients (OA) [Manchikanti, Colliver, Grow, Demeyer, Hadley & Roush], 180
- verapamil**  
counteracts hypertension in gravid ewes (OA) [Norris, Rose & Dewan], 254  
effects of inhalational anesthetics on, in dogs (OA) [Chelly, Hysing, Abernethy, Doursout & Merin], 266
- Phenobarbital, See under Anesthetics, intravenous**
- Phenytoin, See under Anticonvulsants**
- Phrenic nerve stimulation, See under Monitoring**
- Placenta**  
and uptake and distribution of, in fetal lambs (OA) [Kennedy, Miller, Bell, Doshi, deSousa, Kennedy, Heald & David], 247
- Plasma concentration-effect curves, See under Potency anesthetics**
- Platelets, See under Blood**
- Pneumocephalus, See under Tension pneumocephalus**
- Pneumonitis, See under Complications**
- Pohost, G. M., Higgins, C. B., Morganroth, J., Ritchie, J. L., and Schelbert, H. R. (eds.),**  
*New Concepts in Cardiac Imaging* (BR), 135
- Polymorphous ventricular tachycardia, See under Heart**
- Polymyxin, See under Antibiotics**
- Position, See also under Intubation**  
**nerve damage**  
common peroneal nerve palsy associated with Fabella syndrome (CR) [Kubota, Toyoda, Kubota, Kawai & Yamamoto], 552
- sitting**  
surgery in, nitrous oxide withdrawal reduces intracranial pressure in presence of pneumocephalus (OA) [Skahen, Shapiro, Drummond, Todd & Zeiman], 192
- supine**  
infant, venous air embolism and cardiac arrest during craniectomy in (CR) [Harris, Strafford, Rowe, Sanders, Winston & Rockoff], 547
- Positive end-expiratory pressure, See under Ventilation**
- Postjunctional, See under Neuromuscular junction**
- Posttetanic repetition and potentiation, See under Neuromuscular junction**
- Potassium, See under Ions**
- Potency**  
**anesthetic**  
**age factors**  
and increased sensitivity to etomidate in elderly (OA) [Arden, Holley & Stanski], 19

- alfentanil**  
dose-response curves and pharmacokinetics of (EV) [Waud & Waud], 355  
plasma concentrations of, required to supplement nitrous oxide anesthesia for general surgery (OA) [Ausems, Hug, Stanski & Burm], 362
- MAC**  
halothane, requirements, determination of, in study of aminophylline treatment in rats and dogs (OA) [Nicholis, Louie, Prokocimer & Maze], 637  
of isoflurane, and cerebral blood flow and glucose utilization during (OA) [Maekawa, Tommasino, Shapiro, Keifer-Goodman & Kohlenberger], 144
- plasma concentration-effect curves**  
of alfentanil, required to supplement nitrous oxide anesthesia for general surgery (OA) [Ausems, Hug, Stanski & Burm], 362  
and pharmacokinetics of alfentanil (EV) [Waud & Waud], 355
- Preeclampsia, See under Complications; Pregnancy**
- Pregnancy**  
**abortion**  
risk of, following general anesthesia for surgery during pregnancy (CO) [Cohen], 706  
risk of, following general anesthesia for surgery during pregnancy (CO) [Duncan], 706
- normal**  
effect of, on oxyhemoglobin dissociation curve (LR) [Kambam, Handte, Brown & Smith], 426
- preeclampsia**  
effect of, on oxyhemoglobin dissociation curve (LR) [Kambam, Handte, Brown & Smith], 426
- teratogenicity**  
in lidocaine administration in Sprague-Dawley rats (OA) [Fujinaga & Mazze], 626
- Prejunctional activity, See under Neuromuscular junction**
- Premedication**  
**midazolam**  
pharmacokinetics of, in children (CR) [Saint-Maurice, Meistelman, Rey, Esteve, deLauture & Olive], 536
- Premedication, See under Pharmacology**
- Primary afferents, See under Nerve(s)**
- Protein**  
**binding**  
**ovine**  
and uptake and distribution of, in fetal lambs (OA) [Kennedy, Miller, Bell, Doshi, deSousa, Kennedy, Heald & David], 247
- Pruritis, See under Complications**
- Pseudoaneurysm, See under Arteries**
- Pulmonary arteries, See under Arteries; Lung(s)**
- Pulmonary edema, See under Complications**
- Pulmonary, See under Lung(s)**
- Pulse oximeter, See under Equipment**
- Pulse oximetry, See under Monitoring**
- Pumps, See under Equipment**
- Purkinje fibers, See under Heart**
- Q**
- Quinidine, See under Heart**
- R**
- Radial arteries, See under Arteries**
- Radionuclide contrast angiography, See under Measurement techniques**
- Ranitidine, See under Histamine, antagonists; Pharmacology**
- Rapid sequence, priming principle, See under Anesthetic techniques**
- Receptors**  
**adenosine**  
during halothane anesthesia, epinephrine arrhythmogenicity enhanced by (OA) [Prokocimer, Nicholis, Gaba & Maze], 13
- opiate**  
and cardiorespiratory effects and kinetics of intrathecally injected D-Ala<sup>2</sup>-D-Leu<sup>5</sup>-enkephalin and morphine in unanesthetized dogs (OA) [Atchison, Durant & Yaksh], 609
- Receptors, See under Analgesics**
- Records**  
**anesthesia**  
computerized (CO) [Noel], 133  
computerized (CO) [Rosen & Rosenzweig], 131  
computerized (CO) [Sarnat], 132
- Recovery**  
**drug**  
extent of, of inhaled anesthetics in humans (OA) [Carpenter, Eger, Johnson, Unadkat & Sheiner], 201
- Regional anesthesia, See under Anesthetic techniques**
- Regional circulation, See under Blood flow**
- Renal failure, See under Complications; Kidney**
- Renal function**  
following anesthesia in obese and nonobese Fischer 344 rats (OA) [Rice & Fish], 28
- Renal toxicity, See under Toxicity**
- Reproductive toxicity, See under Toxicity**
- Research**  
**biomedical**  
animal welfare and (CO) [Rackow], 442
- Research award, See under Award**
- Respiratory depression, See under Complications; Lung(s)**
- Respiratory quotient, See under Metabolism**
- Respiratory resistance, See under Lung(s)**
- Resuscitation**  
**cardiopulmonary**  
effects of fructose-1,6-diphosphate, glucose, and saline on (OA) [Farias, Willis & Gregory], 595
- Resuscitation equipment, See under Equipment**
- Rogers, M. C. (ed.)**  
*1985 Yearbook of Critical Care Medicine* (BR), 352
- S**
- Scavengers, See under Equipment**
- Shock**  
**effects of ventilation**  
high-frequency jet, hemodynamic effects of (OA) [Fusciardi, Rouby, Barakat, Mal, Godet & Viars], 485  
preservation of cerebral metabolites by etomidate during, in dogs (OA) [Milde & Milde], 272
- trauma**  
hypokalemia in (CR) [Shin, Mackenzie & Helrich], 90
- Sitting position, See under Position**
- Skeletal muscle, See under Muscle**
- Soda lime canister, See under Equipment**
- Solubility**  
**partial pressure concentration**  
concentration *versus*: which is important? (CO) [Eger], 122  
concentration *versus*: which is important? (CO) [Nakagawara, Yoshitake & Minakami], 123  
concentration *versus*: which is important? (CO) [Welch], 123
- partition coefficients**  
concentration *versus* partial pressure: which is important? (CO) [Eger], 122

- concentration *versus* partial pressure: which is important? (CO) [Nakagawara, Yoshitake & Minakami], 123
- concentration *versus* partial pressure: which is important? (CO) [Welch], 123
- solubility in human tissues, effect of age on (L.R.) [Lerman, Schmitt-Bantel, Gregory, Willis & Eger], 307
- Somatosensory evoked potentials, See under Measurement techniques; Monitoring**
- Spectrometer**  
mass, *See under Equipment*
- Spinal anesthesia, See under Anesthetic techniques**
- Spinal cord**  
**evoked potentials**  
effects of halothane, enflurane, isoflurane, and nitrous oxide on, in humans (OA) [Peterson, Drummond & Todd], 35
- pain coding**  
and hyperalgesic response in patient receiving high concentrations of spinal morphine (CO) [Ali], 449
- Statistics**  
assessment of, in cerebral protection for bypass using barbiturate (CO) [Michenfelder], 232
- assessment of, in cerebral protection for bypass using barbiturate (CO) [Shanks, Harter & Brunner], 232
- assessment of, in cerebral protection for bypass using barbiturate (CO) [Slogoff, Nussmeier & Arlund], 233
- Stethoscope, See under Equipment**
- Stiff-baby syndrome, See under Muscle, skeletal**
- Stimulator nerve, See under Monitoring**
- Stomach, See under Gastrointestinal tract**
- Stroke, See under Brain**
- Substance abuse, See under Drug abuse and specific substances**
- Succinylcholine, See under Muscle relaxants; Neuromuscular relaxants**
- Sufentanil, See under Analgesics, narcotic; Anesthetics, intravenous**
- Supine, See under Position**
- Surgery**  
**abdominal**  
**cholecystectomy**  
and failure of epidural anesthesia to prevent postoperative paralytic ileus (OA) [Wallin, Cassuto, Högström, Rimbäck, Faxén & Tollesson], 292
- arthroscopy**  
**shoulder**  
pulse oximetry during (CO) [Herschman, Frost & Goldiner], 565
- breast**  
dose-response curves and pharmacokinetics of alfentanil during (EV) [Waud & Waud], 355
- plasma concentrations of alfentanil required to supplement nitrous oxide anesthesia for (OA) [Ausems, Hug, Stanski & Burm], 362
- bronchoscopy**  
of nebulized racemic epinephrine to facilitate removal of aspirated peanut fragments in pediatric patients (CR) [Bready, Orr, Petty, Grover & Harman], 523
- cardiac**  
barbiturate protection during, recommendations regarding (CO) [Scheller, Drummond, Todd, Shapiro & Zornow], 230
- for bypass, cerebral protection by barbiturate (CO) [Michenfelder], 232
- for bypass, cerebral protection by barbiturate (CO) [Shanks, Harter & Brunner], 232
- for bypass, cerebral protection by barbiturate (CO) [Slogoff, Nussmeier & Arlund], 233
- cardiopulmonary bypass**  
in children 11 days to 4 years of age, changes in lung volume and lung-thorax compliance during (OA) [Jonmarker, Larsson & Werner], 259
- drug infusion with Paceport™ Swan-Ganz catheter during (CO) [Dodson, Larach & Hensley], 113
- myocardial revascularization, safety and efficacy of esmolol during (OA) [Girard, Shulman, Thys, Mindich, Mikula & Kaplan], 157
- cardiovascular**  
in children 11 days to 4 years of age, changes in lung volume and lung-thorax compliance during (OA) [Jonmarker, Larsson & Werner], 259
- carotid endarterectomy**  
esmolol in controlling increases in heart rate and blood pressure during endotracheal intubation for (CR) [Cucchiara, Benefiel, Matteo, DeWood & Albin], 528
- gynecologic**  
dose-response curves and pharmacokinetics of alfentanil during (EV) [Waud & Waud], 355
- plasma concentrations of alfentanil required to supplement nitrous oxide anesthesia for (OA) [Ausems, Hug, Stanski & Burm], 362
- lithotripsy**  
extracorporeal shock wave, supraventricular tachycardia associated with (CR) [Walts & Atlee], 521
- lower abdominal**  
dose-response curves and pharmacokinetics of alfentanil during (EV) [Waud & Waud], 355
- plasma concentrations of alfentanil required to supplement nitrous oxide anesthesia for (OA) [Ausems, Hug, Stanski & Burm], 362
- neurologic**  
venous air embolism and cardiac arrest during, in supine infant (CR) [Harris, Strafford, Rowe, Sanders, Winston & Rockoff], 547
- ophthalmologic**  
open eye, anesthesia for (CO) [Bourke], 110
- open eye, anesthesia for (CO) [Weiner, Olk & Meyers], 109
- in penetrating ocular injuries (CO) [Rich, Witherspoon, Morris & Feist], 108
- orthopedics**  
cemented total knee replacement, monitored cardiovascular collapse during (CR) [Byrick, Forbes & Waddell], 213
- thoracotomy**  
continuous-flow apneic ventilation during (OA) [Babinski, Smith & Bunegin], 399
- CPAP oxygenation during one-lung ventilation for, using underwater seal assembly (CO) [Baraka, Sibai, Muallem, Baroody, Haroun & Mekkaoui], 102
- thymectomy**  
in myasthenia gravis, predicting need for postoperative mechanical ventilation in (CR) [Eisenkraft, Papatestas, Kahn, Mora, Fagerstrom & Jenkins], 79
- upper abdominal**  
dose-response curves and pharmacokinetics of alfentanil during (EV) [Waud & Waud], 355
- plasma concentrations of alfentanil required to supplement nitrous oxide anesthesia for (OA) [Ausems, Hug, Stanski & Burm], 362
- Swan-Ganz catheters, See under Equipment**
- Sympathetic block, See under Anesthetic techniques**
- Sympathetic nervous system**  
**adrenal medulla**  
and site of action for droperidol-evoked hypertensive response (OA) [Montiel, Artalejo, Bermejo & Sánchez-García], 474



**catecholamines**

**epinephrine**

- acceleration of absorption of, by lidocaine (CO) [Sosis & Temple], 103
- acceleration of absorption of, by lidocaine (CO) [Ueda], 104
- arrhythmogenicity enhanced by aminophylline administration during halothane anesthesia in dogs (OA) [Prokocimer, Nicholis, Gaba & Maze], 13
- intravenous, effect of, on uterine artery blood flow velocity in pregnant guinea pig (OA) [Chestnut, Weiner, Martin, Herrig & Wang], 633
- local anesthetics with, for epidural anesthesia in preeclampsia (CR) [Heller & Goodman], 224
- during simultaneous recording of maternal and fetal heart rate (CO) [Abouleish & Johnson], 558
- during simultaneous recording of maternal and fetal heart rate (CO) [Chestnut & Weiner], 558
- test dose, maternal heart rate changes with (CR) [Cartwright, McCarroll & Antzaka], 226
- for treatment of hyperkalemia (CO) [Vitez], 350
- and site of action for droperidol-evoked hypertensive response (OA) [Montiel, Artalejo, Bermejo & Sánchez-García], 474

**central nonadrenergic transmission**

- and halothane requirements in aminophylline treatment in rats and dogs (OA) [Nicholis, Louie, Prokocimer & Maze], 637

**clonidine**

- ethacrynic acid interferes with (CO) [Hosking], 128
- ethacrynic acid interferes with (CO) [Johnston, Nicholas, Lawson, Wallfisch & Arens], 129
- therapy for perioperative period (CO) [Bernstein], 451

**dopaminergic receptors**

- and site of action for droperidol-evoked hypertensive response (OA) [Montiel, Artalejo, Bermejo & Sánchez-García], 474

**esmolol**

- in controlling increases in heart rate and blood pressure during endotracheal intubation in patients undergoing carotid endarterectomy (CR) [Cucchiara, Benefiel, Matteo, DeWood & Albin], 528

**sympatholytic agents**

**esmolol**

- safety and efficacy of, during myocardial revascularization (OA) [Girard, Shulman, Thys, Mindich, Mikula & Kaplan], 157

**sympathomimetic agents**

**isoproterenol**

- effect on cardiac output, and extravascular lung water measurements made with thermoconductivity method (LR) [Noble & Kay], 206

**Sympatholytic agents, See under Sympathetic nervous system**

**Sympathomimetic agents, See under Sympathetic nervous system**

**Synapse, See under Neuromuscular junction**

**Systolic blood pressure, See under Circulation**

**T**

**Tachycardia, See under Heart**

**Temperature**

**regulation**

- blood warming devices do not guarantee (CO) [Vaghadia], 237

**Temperature blanket, See under Equipment**

**Tension pneumocephalus**

- nitrous oxide withdrawal reduces intracranial pressure in presence of (OA) [Skahen, Shapiro, Drummond, Todd & Zeiman], 192

**Tension, See under Carbon dioxide; Oxygen**

**Teratogenicity, See under Pregnancy; Toxicity**

**Tetracaine, See under Anesthetics, local**

**Thermography, See under Measurement techniques**

**Thiopental, See under Anesthetics, intravenous**

**Thoracic anesthesia, See under Anesthesia**

**Thoraco-abdominal partitioning, See under Ventilation**

**Thoracotomy, See under Surgery**

**Thromboembolism, See under Embolism**

**Thymectomy, See under Surgery**

**Tissues, See under Anatomy**

**Tobacco, See under Blood pressure**

**Tolerance**

**alcohol**

- and effects of chronic alcohol intake on anesthetic responses to diazepam and thiopental in rats (OA) [Newman, Curran & Becker], 196

**diazepam**

- effects of chronic alcohol intake on anesthetic responses to, in rats (OA) [Newman, Curran & Becker], 196

**Toxicity**

**bupivacaine**

- is related to increased brain sensitivity (CO) [Morishima, Pedersen, Finster, Arthur & Covino], 346

- is related to increased brain sensitivity (CO) [Norris], 346

**fetal**

- in lidocaine administration in Sprague-Dawley rats (OA) [Fujinaga & Mazze], 626

**lidocaine**

- in Sprague-Dawley rats (OA) [Fujinaga & Mazze], 626

**local anesthetics**

- nerve fiber injury in (CO) [Cartwright], 119

- nerve fiber injury in (CO) [Myers, Kalichman, Reisner & Powell], 119

- to nerves, clinical relevance of experimental study on (CO) [Myers, Kalichman, Reisner & Powell], 341

- to nerves, clinical relevance of experimental study on (CO) [Selandier], 340

**renal**

**enflurane**

- following anesthesia in obese and nonobese Fischer 344 rats (OA) [Rice & Fish], 28

**isoflurane**

- following anesthesia in obese and nonobese Fischer 344 rats (OA) [Rice & Fish], 28

**reproductive**

- in lidocaine administration in Sprague-Dawley rats (OA) [Fujinaga & Mazze], 626

**teratogenicity**

- in lidocaine administration in Sprague-Dawley rats (OA) [Fujinaga & Mazze], 626

**Trachea, See under Lung(s)**

**Train-of-four, See under Monitoring**

**Transesophageal echocardiography, See under Measurement techniques**

**Transfusions**

**citrate**

- during hepatic transplantation in humans (OA) [Marquez, Martin, Virji, Kang, Warty, Shaw, Sassano, Waterman, Winter & Pinsky], 457

**Transplantation, See under Surgery; individual organs**

**Trauma, See under Complications; Shock**

**Trimethaphan, See under Blood pressure, hypotension**

**Tubes, See under Equipment**

**T-wave abnormalities, See under Heart**

## U

- Underwater seal assembly, See under Equipment**  
**Unmyelinated afferents, See under Nerve(s)**  
**Uptake of oxygen, See under Oxygen**  
**Uptake, See under Pharmacokinetics**  
**Urologic anesthesia, See under Anesthesia**  
**Uterus**  
 blood flow velocity  
 effect of intravenous epinephrine on, in pregnant guinea pig (OA) [Chestnut, Weiner, Martin, Herrig & Wang], 633

## V

- Vascular resistance, See under Lung(s)**  
**Vasodilator agents, See also under Pharmacology**  
 and cerebral metabolism and EEG during combination of hypocapnia and isoflurane-induced hypotension in dogs (OA) [Artru], 602  
**Vecuronium, See under Neuromuscular relaxants; Pharmacokinetics**  
**Veins**  
 cannulation  
 central venous: new and efficient device (CO) [Ellermeyer & Keifer], 341  
 easy, aids for (CO) [Jarvis], 448  
 jugular  
 cannulation of, new and efficient device for (CO) [Ellermeyer & Keifer], 341  
**Ventilation**  
 apnea  
 continuous-flow, during thoracotomy (OA) [Babinski, Smith & Bunegin], 399  
 artificial  
 continuous-flow apneic, during thoracotomy (OA) [Babinski, Smith & Bunegin], 399  
 breathing pattern  
 noninvasive evaluation of, following ketamine or droperidol (OA) [Morel, Forster & Gemperle], 392  
 carbon dioxide response  
 and epidural morphine in children (OA) [Attia, Ecoffey, Sandouk, Gross & Samii], 590  
 continuous positive airway pressure  
 during one-lung ventilation using underwater seal assembly (CO) [Baraka, Sibai, Muallem, Baroody, Haroun & Mekkaovi], 102  
 continuous positive pressure breathing  
 and hemodynamic effects of high-frequency jet ventilation in patients with and without circulatory shock (OA) [Fusciardi, Rouby, Barakat, Mal, Godet & Viars], 485  
 drug effects  
 diazepam depresses ventilatory response to carbon dioxide (CO) [Bailey, Andriano, Goldman, Stanley & Pace], 348  
 diazepam depresses ventilatory response to carbon dioxide (CO) [Gross], 348  
 effects of, *See under Shock*  
 failure  
 and hemodynamic effects of high-frequency jet ventilation in patients with and without circulatory shock (OA) [Fusciardi, Rouby, Barakat, Mal, Godet & Viars], 485  
 functional residual capacity  
 during ketamine anesthesia in humans (OA) [Mankikian, Cantineau, Sartene, Clergue & Viars], 492  
 high-frequency  
 hemodynamic effects of, in patients with and without circulatory

- shock (OA) [Fusciardi, Rouby, Barakat, Mal, Godet & Viars], 485  
 organ blood flow during, at low and high airway pressure in dogs (OA) [Gioia, Harris, Traystman & Rogers], 50

**hypoventilation**

- hazard, of anesthetic scavenging device (CO) [Choi, Guida & Wu], 126

**mechanical**

- in children 11 days to 4 years of age, changes in lung volume and lung-thorax compliance during cardiac surgery (OA) [Jonmarker, Larsson & Werner], 259  
 postoperative, predicting need for, in myasthenia gravis (CR) [Eisenkraft, Papastetas, Kahn, Mora, Fagerstrom & Genkins], 79

**one-lung**

- CPAP oxygenation during, using underwater seal assembly (CO) [Baraka, Sibai, Muallem, Baroody, Haroun & Mekkaovi], 102

**pattern of breathing**

- does halothane really reduce diaphragmatic contractility (CO) [Clergue & Aubier], 702  
 does halothane really reduce diaphragmatic contractility (CO) [Drummond], 701  
 during ketamine anesthesia in humans (OA) [Mankikian, Cantineau, Sartene, Clergue & Viars], 492

**positive end-expiratory pressure**

- in children 11 days to 4 years of age, changes in lung volume and lung-thorax compliance during cardiac surgery (OA) [Jonmarker, Larsson & Werner], 259  
 organ blood flow during, at low and high airway pressure in dogs (OA) [Gioia, Harris, Traystman & Rogers], 50

**thoraco-abdominal partitioning**

- during ketamine anesthesia in humans (OA) [Mankikian, Cantineau, Sartene, Clergue & Viars], 492

**zero end-expiratory pressure**

- in children 11 days to 4 years of age, changes in lung volume and lung-thorax compliance during cardiac surgery (OA) [Jonmarker, Larsson & Werner], 259

**Ventilators, See under Equipment****Ventricular function, See under Arteries; Heart****Verapamil, See under Anesthetic techniques, hypotension, induced; Drug interactions; Pharmacology****Visual evoked potentials, See under Monitoring****Volatile anesthetics, See under Anesthetics****Vomiting****antiemetics**

- effect of pretreatment with, on postanesthetic vomiting in children undergoing strabismus surgery (CR) [Lerman, Eustis & Smith], 322

**droperidol**

- effect of pretreatment with, on postanesthetic vomiting in children undergoing strabismus surgery (CR) [Lerman, Eustis & Smith], 322

## W

**Warmer, patient, See under Equipment****Widmann, F. K. (ed.)**

*Technical Manual of the American Association of Blood Banks (BR)*, 242

## Z

**Zero end-expiratory pressure, See under Ventilation**
